# Supplementary material for: KBTBD4-UM171-CoREST1 Axis Prevents Stress-Induced Aging of Human Hematopoietic Stem Cells
Source: Research Square preprint supplement (doi:10.21203/rs.3.rs-6355173/v1), 2025-05-28
Supplement: Supplementary file 1 [file f30b07a85d57c198ff342c90.xlsx]

## Sheet: S1A
p_val	avg_log2FC	pct.1	pct.2	p_val_adj	cluster	gene	regulation
7.14E-91	0.937571	0.93	0.62	4.33E-86	CD34+ Gran	ANXA2	Up
3.09E-74	0.722873	0.409	0.054	1.87E-69	CD34+ Gran	GZMA	Up
8.64E-54	0.929659	0.553	0.227	5.24E-49	CD34+ Gran	ID1	Up
5.41E-46	0.5599	0.996	0.964	3.28E-41	CD34+ Gran	LGALS1	Up
1.77E-45	0.8295	0.938	0.87	1.07E-40	CD34+ Gran	HGF	Up
6.36521E-32	0.513761	0.61	0.359	3.85878E-27	CD34+ Gran	SELL	Up
1.62981E-28	0.535331	0.464	0.234	9.88042E-24	CD34+ Gran	UCHL1	Up
3.48711E-26	0.503138	0.756	0.556	2.11399E-21	CD34+ Gran	MEG3	Up
1.38917E-24	0.415411	0.996	0.964	8.42154E-20	CD34+ Gran	VIM	Up
1.50888E-24	0.50688	0.927	0.863	9.1473E-20	CD34+ Gran	ID2	Up
5.89486E-24	0.22544	0.175	0.032	3.57364E-19	CD34+ Gran	IGSF3	Up
6.48695E-24	0.285493	0.196	0.044	3.93258E-19	CD34+ Gran	CRABP1	Up
1.61118E-23	0.253101	0.17	0.031	9.76748E-19	CD34+ Gran	RBP7	Up
1.00596E-21	0.287103	0.319	0.135	6.09844E-17	CD34+ Gran	CFH	Up
7.45902E-21	0.380245	0.905	0.791	4.52188E-16	CD34+ Gran	S100A10	Up
1.12489E-20	0.714853	0.366	0.191	6.8194E-16	CD34+ Gran	VCAN	Up
3.44105E-20	0.389996	0.598	0.407	2.08607E-15	CD34+ Gran	CKAP4	Up
6.80904E-20	0.318352	0.999	0.992	4.12785E-15	CD34+ Gran	HLA-B	Up
9.30029E-20	0.403165	0.244	0.09	5.63811E-15	CD34+ Gran	ID3	Up
1.46512E-19	0.360253	0.764	0.59	8.88199E-15	CD34+ Gran	TNFSF10	Up
2.18627E-19	0.271656	0.292	0.125	1.32538E-14	CD34+ Gran	PROCR	Up
2.26181E-19	0.284778	0.258	0.1	1.37118E-14	CD34+ Gran	MS4A4A	Up
7.65044E-19	0.396884	0.731	0.556	4.63793E-14	CD34+ Gran	PTMS	Up
9.86229E-19	0.3216	0.277	0.117	5.97882E-14	CD34+ Gran	KCTD12	Up
1.27916E-18	0.256041	0.342	0.168	7.75468E-14	CD34+ Gran	ALDH1A1	Up
9.11337E-18	0.379881	0.569	0.37	5.5248E-13	CD34+ Gran	LY86	Up
1.13664E-17	0.320096	0.466	0.281	6.89063E-13	CD34+ Gran	LY96	Up
2.80477E-17	0.427993	0.425	0.26	1.70034E-12	CD34+ Gran	F13A1	Up
2.85533E-17	0.332546	0.366	0.195	1.73099E-12	CD34+ Gran	CKB	Up
3.08817E-16	0.380932	0.829	0.691	1.87214E-11	CD34+ Gran	TCF4	Up
5.67079E-16	0.706099	0.639	0.508	3.4378E-11	CD34+ Gran	S100A9	Up
7.28154E-16	0.264626	0.213	0.082	4.41429E-11	CD34+ Gran	TM4SF1	Up
5.75997E-15	0.336635	0.926	0.848	3.49186E-10	CD34+ Gran	HLA-DPA1	Up
5.80929E-15	-0.225794	1	1	3.52177E-10	CD34+ Gran	FTL	Down
7.09336E-15	0.393207	0.54	0.405	4.30021E-10	CD34+ Gran	KLF4	Up
1.03007E-14	-0.292207	0.994	0.997	6.24457E-10	CD34+ Gran	GSTP1	Down
1.06929E-14	0.17908	0.148	0.043	6.48238E-10	CD34+ Gran	AC239798.1	Up
1.7567E-14	-0.304817	0.736	0.836	1.06497E-09	CD34+ Gran	CORO1A	Down
2.32237E-14	0.383682	0.987	0.964	1.40789E-09	CD34+ Gran	LYZ	Up
2.3311E-14	0.372044	0.762	0.636	1.41318E-09	CD34+ Gran	SPINK2	Up
2.64601E-14	0.33371	0.979	0.911	1.60409E-09	CD34+ Gran	HLA-DRA	Up
3.80994E-14	0.277065	0.34	0.192	2.3097E-09	CD34+ Gran	SCN9A	Up
4.96917E-14	0.33472	0.859	0.731	3.01246E-09	CD34+ Gran	HLA-DPB1	Up
7.83425E-14	-0.256179	0.988	0.997	4.74936E-09	CD34+ Gran	AIF1	Down
9.63429E-14	0.296037	0.437	0.287	5.8406E-09	CD34+ Gran	ANKH	Up
1.38621E-13	0.166826	0.148	0.046	8.40362E-09	CD34+ Gran	TNNT1	Up
1.64203E-13	0.320986	0.983	0.963	9.95445E-09	CD34+ Gran	TPM4	Up
1.88082E-13	0.304487	0.96	0.9	1.14021E-08	CD34+ Gran	CD44	Up
2.81283E-13	0.188928	0.21	0.089	1.70522E-08	CD34+ Gran	ALOX15B	Up
4.63211E-13	0.301928	0.556	0.398	2.80812E-08	CD34+ Gran	MEG8	Up
8.13535E-13	0.406982	0.944	0.89	4.9319E-08	CD34+ Gran	CYTL1	Up
1.03471E-12	0.171963	0.185	0.073	6.27272E-08	CD34+ Gran	TRIM7	Up
1.2713E-12	0.208522	0.235	0.112	7.70701E-08	CD34+ Gran	JPH1	Up
1.68784E-12	0.308016	0.637	0.508	1.02322E-07	CD34+ Gran	RBM47	Up
1.83901E-12	0.291006	0.924	0.819	1.11486E-07	CD34+ Gran	IFI16	Up
2.89601E-12	0.223795	0.997	0.999	1.75565E-07	CD34+ Gran	HLA-A	Up
3.8583E-12	0.287297	0.361	0.218	2.33902E-07	CD34+ Gran	AL590226.1	Up
3.94576E-12	0.334461	0.803	0.681	2.39204E-07	CD34+ Gran	PRDX1	Up
8.13785E-12	0.327519	0.65	0.529	4.93341E-07	CD34+ Gran	DST	Up
2.41383E-11	0.316998	0.921	0.852	1.46333E-06	CD34+ Gran	HLA-DRB1	Up
6.82193E-11	0.178893	0.173	0.075	4.13566E-06	CD34+ Gran	PALLD	Up
7.11199E-11	0.204074	0.549	0.405	4.3115E-06	CD34+ Gran	HPGDS	Up
7.83243E-11	0.246967	0.527	0.387	4.74825E-06	CD34+ Gran	FRMD4B	Up
1.20604E-10	0.184275	0.227	0.115	7.3114E-06	CD34+ Gran	SLC7A8	Up
1.37323E-10	0.281437	0.255	0.14	8.32495E-06	CD34+ Gran	CCL3L1	Up
1.37335E-10	0.187494	0.163	0.069	8.32563E-06	CD34+ Gran	EMP1	Up
1.46376E-10	0.198104	0.286	0.16	8.87378E-06	CD34+ Gran	ZNF521	Up
1.5559E-10	0.227766	0.474	0.327	9.43236E-06	CD34+ Gran	HLA-DQB1	Up
2.19835E-10	-0.81935	0.963	0.957	1.3327E-05	CD34+ Gran	PRTN3	Down
2.59765E-10	0.245866	0.588	0.451	1.57477E-05	CD34+ Gran	IFI27L2	Up
2.82477E-10	0.24036	0.34	0.214	1.71246E-05	CD34+ Gran	APOE	Up
3.02226E-10	0.190496	0.352	0.217	1.83218E-05	CD34+ Gran	CDA	Up
3.04868E-10	0.245337	0.865	0.772	1.8482E-05	CD34+ Gran	CLU	Up
3.35614E-10	0.262787	0.511	0.371	2.03459E-05	CD34+ Gran	KLF2	Up
3.82564E-10	0.337065	0.548	0.417	2.31922E-05	CD34+ Gran	NOG	Up
4.65811E-10	0.342824	0.46	0.326	2.82389E-05	CD34+ Gran	CD34	Up
5.59088E-10	0.245884	0.404	0.274	3.38936E-05	CD34+ Gran	TRH	Up
6.07673E-10	0.290349	0.517	0.388	3.6839E-05	CD34+ Gran	GNG11	Up
7.28289E-10	-0.256881	0.549	0.668	4.4151E-05	CD34+ Gran	ACSS2	Down
8.67676E-10	-0.269418	0.341	0.466	5.26011E-05	CD34+ Gran	CTSW	Down
9.1388E-10	0.169085	0.175	0.081	5.54021E-05	CD34+ Gran	CTSH	Up
9.29422E-10	-0.271745	0.965	0.962	5.63444E-05	CD34+ Gran	GLUL	Down
9.5319E-10	0.198515	0.355	0.226	5.77852E-05	CD34+ Gran	GPR174	Up
1.01116E-09	0.165887	0.254	0.139	6.12994E-05	CD34+ Gran	UGT3A2	Up
1.18293E-09	0.183039	0.359	0.23	7.1713E-05	CD34+ Gran	GASK1B	Up
1.22406E-09	-0.269813	0.961	0.978	7.42059E-05	CD34+ Gran	SCD	Down
1.23889E-09	0.232487	0.361	0.237	7.5105E-05	CD34+ Gran	CCNA1	Up
1.36999E-09	0.271703	0.802	0.701	8.30532E-05	CD34+ Gran	ATP2B1-AS1	Up
1.74339E-09	0.229594	0.86	0.774	0.00010569	CD34+ Gran	CTSS	Up
1.90341E-09	0.244616	0.772	0.69	0.00011539	CD34+ Gran	GFI1	Up
2.06206E-09	0.120725	0.105	0.034	0.000125008	CD34+ Gran	LAYN	Up
2.13441E-09	0.18103	0.232	0.127	0.000129395	CD34+ Gran	LINC01215	Up
2.25642E-09	0.13225	0.14	0.057	0.000136791	CD34+ Gran	ARMCX2	Up
2.38407E-09	0.243008	0.567	0.455	0.00014453	CD34+ Gran	HERC5	Up
2.85105E-09	0.130206	0.157	0.069	0.000172839	CD34+ Gran	MFAP2	Up
2.92545E-09	0.259297	0.469	0.345	0.000177349	CD34+ Gran	TNIK	Up
2.96549E-09	0.258549	0.938	0.889	0.000179777	CD34+ Gran	ITGA4	Up
3.05398E-09	0.213132	0.421	0.294	0.000185142	CD34+ Gran	IDS	Up
3.60456E-09	0.267816	0.673	0.562	0.000218519	CD34+ Gran	GCNT1	Up
4.74169E-09	0.210076	0.399	0.273	0.000287455	CD34+ Gran	ZFP36L1	Up
5.42173E-09	-0.221014	0.948	0.97	0.000328682	CD34+ Gran	CDK6	Down
5.45746E-09	0.222984	0.233	0.132	0.000330848	CD34+ Gran	CALD1	Up
6.47836E-09	0.15293	0.975	0.951	0.000392738	CD34+ Gran	S100A6	Up
7.53914E-09	0.172346	0.177	0.088	0.000457045	CD34+ Gran	LPAR3	Up
7.78282E-09	0.216785	0.425	0.303	0.000471818	CD34+ Gran	SCPEP1	Up
8.35162E-09	0.135283	0.188	0.094	0.0005063	CD34+ Gran	PDE4A	Up
8.56389E-09	0.312516	0.786	0.685	0.000519168	CD34+ Gran	CPA3	Up
8.94657E-09	-0.243636	0.964	0.978	0.000542368	CD34+ Gran	P4HB	Down
9.025E-09	0.339889	0.266	0.162	0.000547123	CD34+ Gran	CLEC4O	Up
1.1345E-08	0.203658	0.619	0.504	0.00068777	CD34+ Gran	SERPING1	Up
1.20102E-08	-0.228386	0.965	0.979	0.000728094	CD34+ Gran	IDI1	Down
1.32143E-08	0.254491	0.681	0.558	0.000801089	CD34+ Gran	AKR1B1	Up
1.81348E-08	0.313428	0.747	0.673	0.00109939	CD34+ Gran	ITPR2	Up
1.869E-08	0.272449	0.632	0.518	0.00113304	CD34+ Gran	MEF2C	Up
1.8843E-08	-0.133258	0.104	0.197	0.00114232	CD34+ Gran	LPAR4	Down
2.03616E-08	0.253322	0.663	0.556	0.00123438	CD34+ Gran	SELENOW	Up
2.06941E-08	0.0203923	0.753	0.654	0.00125454	CD34+ Gran	HPGD	Up
2.64579E-08	0.273794	0.746	0.651	0.00160396	CD34+ Gran	CD52	Up
2.79463E-08	0.218742	0.96	0.921	0.00169419	CD34+ Gran	VMP1	Up
2.95466E-08	0.234316	0.662	0.557	0.0017912	CD34+ Gran	ZNRF1	Up
3.31719E-08	-0.23576	0.707	0.783	0.00201098	CD34+ Gran	TIMP1	Down
3.62953E-08	0.138732	0.181	0.093	0.00220033	CD34+ Gran	NFATC4	Up
5.29814E-08	0.137987	1	1	0.00321189	CD34+ Gran	B2M	Up
5.41631E-08	0.151066	0.294	0.185	0.00328353	CD34+ Gran	EPCAM	Up
5.56184E-08	0.206974	0.634	0.531	0.00337175	CD34+ Gran	ARL4A	Up
5.85596E-08	0.15576	0.216	0.121	0.00355006	CD34+ Gran	TMEM176A	Up
6.75205E-08	0.200387	0.874	0.826	0.0040933	CD34+ Gran	SMIM30	Up
7.19278E-08	0.241578	0.437	0.328	0.00436048	CD34+ Gran	PDE4B	Up
7.7527E-08	0.222572	0.844	0.768	0.00469992	CD34+ Gran	AKR1A1	Up
7.84986E-08	-0.245069	0.937	0.953	0.00475882	CD34+ Gran	FADS1	Down
8.80909E-08	0.129755	0.197	0.107	0.00534034	CD34+ Gran	ETS1	Up
9.26926E-08	-0.204698	0.813	0.864	0.0056193	CD34+ Gran	SYNGR1	Down
9.87801E-08	0.214425	0.64	0.522	0.00598834	CD34+ Gran	TIPARP	Up
1.05525E-07	0.230755	0.305	0.205	0.00639725	CD34+ Gran	TMEM176B	Up
1.20261E-07	0.177652	0.937	0.901	0.00729059	CD34+ Gran	RABAC1	Up
1.53247E-07	-0.233099	0.89	0.924	0.00929029	CD34+ Gran	PXK	Down
1.56348E-07	-0.208535	0.997	0.998	0.00947828	CD34+ Gran	MGST1	Down
1.57302E-07	0.25603	0.521	0.42	0.00953613	CD34+ Gran	SGK1	Up
1.83983E-07	-0.752398	0.931	0.935	0.0111536	CD34+ Gran	AZU1	Down
1.88118E-07	0.165113	0.318	0.213	0.0114043	CD34+ Gran	LINC00632	Up
1.92117E-07	0.213244	0.417	0.297	0.0116467	CD34+ Gran	BEX2	Up
2.29107E-07	-0.369563	0.273	0.37	0.0138891	CD34+ Gran	S100P	Down
2.43422E-07	0.120433	0.189	0.103	0.014757	CD34+ Gran	EPSTI1	Up
2.95094E-07	0.100723	0.132	0.061	0.0178895	CD34+ Gran	MICAL2	Up
3.32123E-07	0.18038	0.91	0.873	0.0201343	CD34+ Gran	HLA-C	Up
3.41027E-07	0.250992	0.477	0.37	0.020674	CD34+ Gran	PIM1	Up
3.6874E-07	0.212256	0.376	0.271	0.0223541	CD34+ Gran	RASGEF1B	Up
4.18506E-07	-0.172336	0.953	0.961	0.0253711	CD34+ Gran	TALDO1	Down
4.69258E-07	0.133694	0.208	0.121	0.0284478	CD34+ Gran	NRP2	Up
4.83465E-07	0.160582	0.4	0.287	0.0293091	CD34+ Gran	FRY	Up
5.21913E-07	0.169377	0.4	0.292	0.0316399	CD34+ Gran	JAKMIP2	Up
5.64235E-07	0.122479	0.221	0.132	0.0342056	CD34+ Gran	ZC2HC1A	Up
5.89272E-07	-0.206544	0.587	0.674	0.0357234	CD34+ Gran	AGTRAP	Down
6.76292E-07	-0.173056	0.173	0.265	0.0409988	CD34+ Gran	RGL4	Down
7.9239E-07	0.163548	0.345	0.24	0.0480371	CD34+ Gran	SERPINB9	Up
7.98138E-07	0.163405	0.713	0.61	0.0483855	CD34+ Gran	AHNAK	Up
8.03329E-07	-0.206452	0.804	0.875	0.0487002	CD34+ Gran	SUCNR1	Down
8.18073E-07	-0.190501	0.54	0.64	0.049594	CD34+ Gran	RAB5B	Down
8.23661E-07	-0.174895	0.911	0.934	0.0499328	CD34+ Gran	ASAH1	Down
8.3307E-07	0.197616	0.877	0.822	0.0505032	CD34+ Gran	DUSP1	Up
8.49853E-07	0.132727	0.194	0.112	0.0515207	CD34+ Gran	PPP1R14A	Up
8.71042E-07	0.152583	0.998	0.998	0.0528052	CD34+ Gran	ANKRD28	Up
8.87106E-07	-0.191594	1	1	0.053779	CD34+ Gran	MPO	Down
9.2826E-07	-0.119738	0.995	0.997	0.0562739	CD34+ Gran	PFDN5	Down
9.78965E-07	-0.111429	1	1	0.0593478	CD34+ Gran	RPS8	Down
1.0306E-06	-0.108788	1	1	0.062478	CD34+ Gran	RPS27A	Down
1.08646E-06	-0.226222	0.557	0.635	0.0658642	CD34+ Gran	GLA	Down
1.12388E-06	-0.325436	0.776	0.812	0.0681327	CD34+ Gran	MS4A3	Down
1.1758E-06	0.189968	0.742	0.661	0.0712806	CD34+ Gran	ANXA5	Up
1.2266E-06	-0.157631	0.999	0.998	0.0743604	CD34+ Gran	EEF1B2	Down
1.24508E-06	0.184988	0.758	0.635	0.0754802	CD34+ Gran	CD53	Up
1.27814E-06	-0.451549	1	1	0.0774849	CD34+ Gran	SRGN	Down
1.29981E-06	0.155988	0.361	0.26	0.0787981	CD34+ Gran	PPFIBP1	Up
1.37734E-06	-0.261351	0.92	0.941	0.0834986	CD34+ Gran	TMEM97	Down
1.57924E-06	0.243357	0.432	0.33	0.0957383	CD34+ Gran	GAL	Up
1.66874E-06	0.170585	0.399	0.296	0.101164	CD34+ Gran	RNASE6	Up
1.71824E-06	0.173348	0.359	0.259	0.104165	CD34+ Gran	ITGA6	Up
1.74035E-06	0.186223	0.601	0.509	0.105505	CD34+ Gran	PLD1	Up
1.77667E-06	0.186759	0.855	0.789	0.107707	CD34+ Gran	HLA-DMA	Up
1.77788E-06	0.187482	0.987	0.971	0.10778	CD34+ Gran	CD74	Up
1.78326E-06	-0.186118	0.968	0.959	0.108107	CD34+ Gran	GPX4	Down
1.80394E-06	0.164228	0.248	0.161	0.109361	CD34+ Gran	LUCAT1	Up
1.88402E-06	0.151066	0.374	0.273	0.114215	CD34+ Gran	HK2	Up
1.91979E-06	0.0865573	0.108	0.048	0.116383	CD34+ Gran	HMSD	Up
1.92178E-06	0.174639	0.382	0.284	0.116504	CD34+ Gran	SMARCA1	Up
2.10098E-06	0.208438	0.779	0.724	0.127368	CD34+ Gran	CXCR4	Up
2.35042E-06	0.173786	0.451	0.353	0.142489	CD34+ Gran	RHOH	Up
2.371E-06	0.103397	0.179	0.101	0.143737	CD34+ Gran	NID1	Up
2.44648E-06	0.188289	0.711	0.622	0.148313	CD34+ Gran	IFI6	Up
3.1176E-06	-0.212748	0.9	0.916	0.188998	CD34+ Gran	EBP	Down
3.14932E-06	-0.238714	0.654	0.708	0.190921	CD34+ Gran	MVD	Down
3.28934E-06	-0.106311	1	1	0.199409	CD34+ Gran	RPS19	Down
3.4619E-06	-0.163392	0.861	0.904	0.209871	CD34+ Gran	SNHG29	Down
3.48665E-06	0.205347	0.764	0.674	0.211371	CD34+ Gran	TMX4	Up
3.5843E-06	0.127982	0.166	0.094	0.217291	CD34+ Gran	IL21R	Up
3.85892E-06	-0.10543	1	1	0.233939	CD34+ Gran	RPLP2	Down
3.86282E-06	0.170785	0.326	0.235	0.234176	CD34+ Gran	TIAM1	Up
4.00266E-06	-0.174065	0.25	0.341	0.242653	CD34+ Gran	BAHCC1	Down
4.04974E-06	0.162794	0.442	0.339	0.245507	CD34+ Gran	OSBPL11	Up
4.09263E-06	0.128429	0.2	0.122	0.248108	CD34+ Gran	STON1	Up
4.22906E-06	0.144455	0.271	0.182	0.256378	CD34+ Gran	ATP9A	Up
4.44246E-06	0.173543	0.497	0.405	0.269315	CD34+ Gran	AC244502.1	Up
4.46905E-06	0.172282	0.231	0.149	0.270927	CD34+ Gran	HOPX	Up
4.80382E-06	-0.178029	0.715	0.77	0.291222	CD34+ Gran	DPM3	Down
5.22373E-06	0.194545	0.644	0.568	0.316678	CD34+ Gran	SPARC	Up
6.22392E-06	0.17408	0.683	0.609	0.377312	CD34+ Gran	GNA15	Up
6.45616E-06	0.12575	0.341	0.24	0.391392	CD34+ Gran	HLA-DMB	Up
6.60601E-06	0.112896	0.126	0.065	0.400476	CD34+ Gran	LPL	Up
6.82376E-06	0.103053	0.156	0.088	0.413677	CD34+ Gran	SPINT1	Up
6.94342E-06	0.141343	0.307	0.217	0.420931	CD34+ Gran	USP53	Up
6.94975E-06	0.104976	0.152	0.084	0.421315	CD34+ Gran	RBM38	Up
7.22714E-06	-0.199533	0.78	0.829	0.438131	CD34+ Gran	MYO10	Down
7.43425E-06	0.151595	0.352	0.262	0.450687	CD34+ Gran	PAM	Up
7.4834E-06	0.13819	0.266	0.181	0.453666	CD34+ Gran	GBP2	Up
7.57565E-06	0.162539	0.421	0.329	0.459259	CD34+ Gran	KLF10	Up
8.38735E-06	0.210796	0.438	0.348	0.508467	CD34+ Gran	AFF3	Up
8.71984E-06	0.148983	0.355	0.262	0.528623	CD34+ Gran	SPATS2L	Up
8.91406E-06	0.160672	0.587	0.481	0.540397	CD34+ Gran	SNX10	Up
9.55411E-06	0.205704	0.951	0.912	0.579199	CD34+ Gran	LITAF	Up
9.67063E-06	-0.18755	0.671	0.724	0.586263	CD34+ Gran	MTND1P23	Down
9.78437E-06	0.189955	0.244	0.166	0.593158	CD34+ Gran	AJ009632.2	Up
9.81063E-06	-0.129062	0.11	0.181	0.59475	CD34+ Gran	AC009005.1	Down
1.00452E-05	-0.168988	0.707	0.757	0.608969	CD34+ Gran	PRAM1	Down
1.10145E-05	-0.0932736	1	1	0.66773	CD34+ Gran	RPS14	Down
1.13548E-05	0.143561	0.361	0.268	0.688359	CD34+ Gran	FCGR2A	Up
1.14284E-05	0.140961	0.321	0.231	0.692827	CD34+ Gran	STRIP2	Up
1.14918E-05	0.092723	0.113	0.056	0.69667	CD34+ Gran	BANK1	Up
1.16513E-05	0.194852	0.726	0.65	0.706339	CD34+ Gran	GLIPR1	Up
1.18499E-05	0.133361	0.435	0.336	0.718378	CD34+ Gran	MEGF9	Up
1.21893E-05	-0.174697	0.325	0.412	0.73895	CD34+ Gran	PLPPR3	Down
1.24604E-05	0.280227	0.736	0.688	0.755385	CD34+ Gran	DUSP6	Up
1.35568E-05	-0.181292	0.814	0.851	0.821852	CD34+ Gran	HSD17B12	Down
1.39463E-05	0.0992391	0.119	0.061	0.845468	CD34+ Gran	PREX2	Up
1.41887E-05	0.141482	0.333	0.241	0.86016	CD34+ Gran	LPAR6	Up
1.44535E-05	-0.183345	0.846	0.874	0.876216	CD34+ Gran	DSTN	Down
1.451E-05	0.115533	0.218	0.14	0.879639	CD34+ Gran	AOAH	Up
1.46346E-05	0.123353	0.305	0.215	0.887196	CD34+ Gran	FAM8A1	Up
1.46529E-05	0.153457	0.35	0.261	0.888305	CD34+ Gran	HVCN1	Up
1.49755E-05	0.106435	0.154	0.088	0.907863	CD34+ Gran	AVP	Up
1.56118E-05	0.150875	0.996	0.992	0.946435	CD34+ Gran	S100A11	Up
1.568E-05	-0.220759	0.9	0.928	0.950571	CD34+ Gran	HMGCS1	Down
1.78069E-05	0.117073	0.145	0.082	1	CD34+ Gran	CR1	Up
1.80117E-05	0.155988	0.33	0.245	1	CD34+ Gran	PLXDC2	Up
1.91674E-05	-0.191564	0.784	0.826	1	CD34+ Gran	SLC25A1	Down
2.06295E-05	-0.173201	0.949	0.964	1	CD34+ Gran	PPA1	Down
2.11905E-05	0.117964	0.304	0.217	1	CD34+ Gran	DYNLT3	Up
2.20613E-05	0.11926	0.225	0.149	1	CD34+ Gran	STK33	Up
2.21806E-05	-0.169419	0.805	0.838	1	CD34+ Gran	ACTN1	Down
2.24975E-05	0.174141	0.547	0.463	1	CD34+ Gran	PON2	Up
2.52607E-05	0.101378	0.148	0.086	1	CD34+ Gran	LRP1	Up
2.52806E-05	-0.159722	0.997	0.998	1	CD34+ Gran	MT-ND4L	Down
2.59209E-05	0.1045	0.15	0.088	1	CD34+ Gran	PTGFRN	Up
2.72832E-05	0.190243	0.59	0.512	1	CD34+ Gran	PECAM1	Up
2.80281E-05	0.185086	0.44	0.359	1	CD34+ Gran	ABLIM1	Up
2.81922E-05	0.151654	0.436	0.349	1	CD34+ Gran	MACC1	Up
2.87209E-05	0.138908	0.412	0.319	1	CD34+ Gran	CMAHP	Up
2.95044E-05	-0.14928	0.395	0.487	1	CD34+ Gran	PTPN22	Down
2.98319E-05	0.166428	0.328	0.246	1	CD34+ Gran	NAV1	Up
3.04653E-05	0.175734	0.834	0.775	1	CD34+ Gran	HLA-E	Up
3.1148E-05	-0.089451	0.096	0.161	1	CD34+ Gran	RNF166	Down
3.30376E-05	0.0797756	0.102	0.05	1	CD34+ Gran	ANG	Up
3.35983E-05	0.135452	0.326	0.242	1	CD34+ Gran	FYN	Up
3.36917E-05	0.153428	1	0.998	1	CD34+ Gran	TMSB10	Up
3.39335E-05	0.144331	0.688	0.583	1	CD34+ Gran	FCGRT	Up
3.39762E-05	0.105729	0.168	0.102	1	CD34+ Gran	PKIA	Up
3.4056E-05	-0.13726	0.782	0.833	1	CD34+ Gran	SLC25A37	Down
3.4747E-05	-0.142669	0.99	1	1	CD34+ Gran	ARHGDIB	Down
3.48628E-05	-0.176781	1	1	1	CD34+ Gran	MALAT1	Down
3.48669E-05	0.140154	0.558	0.466	1	CD34+ Gran	FCGR1A	Up
3.49796E-05	0.149703	0.696	0.612	1	CD34+ Gran	CD55	Up
3.58816E-05	0.131969	0.637	0.543	1	CD34+ Gran	FOSL2	Up
3.77296E-05	0.108482	0.213	0.14	1	CD34+ Gran	PLS3	Up
3.81856E-05	-0.084299	1	1	1	CD34+ Gran	RPL37	Down
3.88309E-05	0.0878452	0.12	0.065	1	CD34+ Gran	FSD1	Up
3.88653E-05	0.102972	0.118	0.064	1	CD34+ Gran	LEF1	Up
3.90054E-05	0.145605	0.506	0.423	1	CD34+ Gran	C19orf38	Up
3.94547E-05	-0.217552	0.793	0.826	1	CD34+ Gran	CNIH4	Down
3.97871E-05	-0.211531	0.915	0.93	1	CD34+ Gran	RNASE2	Down
4.02847E-05	-0.165818	0.898	0.899	1	CD34+ Gran	GPI	Down
4.02864E-05	0.122115	0.346	0.263	1	CD34+ Gran	SMARCD3	Up
4.0564E-05	0.148351	0.269	0.193	1	CD34+ Gran	TDRD9	Up
4.1291E-05	-0.194663	0.999	1	1	CD34+ Gran	NEAT1	Down
4.3047E-05	0.144852	0.346	0.262	1	CD34+ Gran	GPR85	Up
4.32345E-05	0.0955528	0.184	0.115	1	CD34+ Gran	EPS8	Up
4.33733E-05	0.152797	0.33	0.253	1	CD34+ Gran	LINC02245	Up
4.57796E-05	0.184404	0.67	0.595	1	CD34+ Gran	SPTBN1	Up
4.62512E-05	0.189263	0.994	0.989	1	CD34+ Gran	FOS	Up
4.63672E-05	0.0836822	0.134	0.076	1	CD34+ Gran	ACP5	Up
4.67312E-05	-0.195132	0.494	0.598	1	CD34+ Gran	RNASE3	Down
4.86623E-05	-0.181479	0.543	0.62	1	CD34+ Gran	LSS	Down
4.93739E-05	0.162925	0.738	0.683	1	CD34+ Gran	VAMP5	Up
5.44133E-05	0.153358	0.956	0.927	1	CD34+ Gran	MARCKS	Up
5.63014E-05	0.137136	0.33	0.251	1	CD34+ Gran	PCED1B-AS1	Up
5.73089E-05	0.15263	0.47	0.377	1	CD34+ Gran	CD109	Up
5.73512E-05	-0.117815	0.413	0.503	1	CD34+ Gran	LST1	Down
6.36704E-05	-0.0784769	1	1	1	CD34+ Gran	RPS27	Down
6.40713E-05	0.077926	0.12	0.066	1	CD34+ Gran	AL133330.1	Up
6.60179E-05	-0.081255	1	1	1	CD34+ Gran	RPS24	Down
6.85668E-05	0.0921182	0.132	0.076	1	CD34+ Gran	PEBP1P3	Up
7.00356E-05	0.153796	0.457	0.376	1	CD34+ Gran	KLRG1	Up
7.01185E-05	0.141388	0.392	0.304	1	CD34+ Gran	ACSM3	Up
7.13609E-05	0.194135	0.468	0.399	1	CD34+ Gran	TCTEX1D1	Up
7.19501E-05	-0.0964818	1	1	1	CD34+ Gran	RPS3	Down
7.2816E-05	-0.172044	0.398	0.471	1	CD34+ Gran	KIT	Down
7.69569E-05	0.133144	0.271	0.195	1	CD34+ Gran	INPP4B	Up
7.72295E-05	0.15555	0.697	0.628	1	CD34+ Gran	CLEC2B	Up
7.94321E-05	-0.165645	0.949	0.954	1	CD34+ Gran	PKM	Down
7.9992E-05	0.12916	0.624	0.524	1	CD34+ Gran	HHEX	Up
8.16305E-05	0.0819506	0.124	0.07	1	CD34+ Gran	AC087741.1	Up
8.23458E-05	0.099937	0.144	0.086	1	CD34+ Gran	BATF3	Up
8.44456E-05	0.14084	0.994	0.986	1	CD34+ Gran	TKT	Up
8.74625E-05	0.116003	0.274	0.197	1	CD34+ Gran	PDLIM1	Up
8.81595E-05	0.123394	0.302	0.224	1	CD34+ Gran	FUCA1	Up
8.94282E-05	-0.108287	0.137	0.206	1	CD34+ Gran	AC122688.3	Down
8.95933E-05	0.268203	0.751	0.724	1	CD34+ Gran	CSTA	Up
8.97156E-05	0.145012	0.343	0.263	1	CD34+ Gran	IL1B	Up
9.30554E-05	0.120866	0.21	0.143	1	CD34+ Gran	AL353622.1	Up
9.33263E-05	0.153978	0.988	0.971	1	CD34+ Gran	2025-03-06	Up
9.4551E-05	-0.101648	1	1	1	CD34+ Gran	RPL5	Down
9.61308E-05	0.0981436	0.153	0.092	1	CD34+ Gran	GPRIN3	Up
9.63542E-05	-0.193946	0.124	0.186	1	CD34+ Gran	AL109615.3	Down
9.74705E-05	0.113896	0.227	0.158	1	CD34+ Gran	SKIL	Up
9.91487E-05	0.17908	0.898	0.867	1	CD34+ Gran	AC020916.1	Up
0.000100582	-0.0821203	1	1	1	CD34+ Gran	RPS29	Down
0.000101434	0.148271	0.764	0.709	1	CD34+ Gran	REEP5	Up
0.000102543	0.110569	0.224	0.154	1	CD34+ Gran	CYBB	Up
0.000102565	0.246203	0.749	0.73	1	CD34+ Gran	MNDA	Up
0.000103596	0.165428	0.357	0.282	1	CD34+ Gran	GPR65	Up
0.000104528	-0.129668	0.971	0.985	1	CD34+ Gran	EIF4B	Down
0.000111945	-0.0834891	0.081	0.137	1	CD34+ Gran	ALDH4A1	Down
0.000116004	-0.0722227	1	1	1	CD34+ Gran	RPLP1	Down
0.00011739	0.0757308	0.115	0.064	1	CD34+ Gran	LDOC1	Up
0.000118566	-0.16484	0.92	0.946	1	CD34+ Gran	FAM107B	Down
0.000119689	0.1111	0.344	0.261	1	CD34+ Gran	ATN1	Up
0.000120336	0.115473	0.176	0.114	1	CD34+ Gran	MAP9	Up
0.000120373	-0.132717	0.548	0.627	1	CD34+ Gran	POLR2E	Down
0.000121722	0.0880562	0.131	0.077	1	CD34+ Gran	SH3PXD2B	Up
0.000123957	-0.144832	0.333	0.419	1	CD34+ Gran	LTC4S	Down
0.000124634	-0.198483	0.601	0.666	1	CD34+ Gran	ELOVL6	Down
0.000126698	-0.143576	0.315	0.394	1	CD34+ Gran	SLCO4C1	Down
0.000128315	0.106781	0.246	0.173	1	CD34+ Gran	AL354718.3	Up
0.000129554	-0.114454	0.618	0.694	1	CD34+ Gran	UBE2J1	Down
0.000134512	-0.175833	0.825	0.862	1	CD34+ Gran	ERG28	Down
0.00013558	0.0832209	0.117	0.066	1	CD34+ Gran	AKR1C3	Up
0.00013721	0.139133	0.769	0.711	1	CD34+ Gran	DNAJC10	Up
0.000137236	0.150925	0.216	0.148	1	CD34+ Gran	SLPI	Up
0.00013947	0.0945636	0.163	0.104	1	CD34+ Gran	RBPMS	Up
0.000139606	-0.145446	1	0.999	1	CD34+ Gran	SERPINB1	Down
0.000139676	0.123561	0.156	0.099	1	CD34+ Gran	LINC01405	Up
0.000139995	-0.17409	0.603	0.647	1	CD34+ Gran	FLNA	Down
0.000140437	0.109493	0.252	0.179	1	CD34+ Gran	KIAA0040	Up
0.000141476	0.135906	0.297	0.224	1	CD34+ Gran	MTA3	Up
0.000141757	0.0858662	0.173	0.111	1	CD34+ Gran	OAS2	Up
0.000143766	0.0938884	0.21	0.143	1	CD34+ Gran	CALCRL	Up
0.000143843	-0.101675	1	1	1	CD34+ Gran	RPS20	Down
0.000146725	-0.0837362	1	1	1	CD34+ Gran	RPS23	Down
0.000147009	0.106958	0.357	0.274	1	CD34+ Gran	CYTIP	Up
0.000147293	0.113269	0.524	0.435	1	CD34+ Gran	MTMR6	Up
0.000147897	-0.100073	1	1	1	CD34+ Gran	RPL7	Down
0.000152011	-0.12581	0.805	0.845	1	CD34+ Gran	BSG	Down
0.000152706	0.158164	0.502	0.422	1	CD34+ Gran	AHR	Up
0.000153996	0.133992	0.328	0.253	1	CD34+ Gran	FAR2	Up
0.000155609	-0.172942	0.874	0.901	1	CD34+ Gran	PHPT1	Down
0.000162807	0.171518	0.5	0.416	1	CD34+ Gran	PTGS2	Up
0.000165057	0.148005	0.236	0.17	1	CD34+ Gran	MAP1A	Up
0.000165153	-0.0913774	1	1	1	CD34+ Gran	RPS6	Down
0.0001666	0.167069	0.628	0.566	1	CD34+ Gran	SNCA	Up
0.000168077	-0.0642749	1	1	1	CD34+ Gran	RPL39	Down
0.000168538	-0.0722483	1	1	1	CD34+ Gran	TPT1	Down
0.000168866	0.119427	0.301	0.226	1	CD34+ Gran	CASP1	Up
0.000169038	0.133335	0.524	0.451	1	CD34+ Gran	CYSTM1	Up
0.000170449	0.146727	0.299	0.228	1	CD34+ Gran	ANXA2R	Up
0.000171385	0.121635	0.311	0.235	1	CD34+ Gran	FCGR1B	Up
0.00017156	0.14905	0.904	0.89	1	CD34+ Gran	RAP1B	Up
0.000172883	0.0765488	0.115	0.065	1	CD34+ Gran	PHLDA1	Up
0.000175742	0.136737	0.521	0.445	1	CD34+ Gran	ZNF580	Up
0.000181242	-0.0722649	1	1	1	CD34+ Gran	RPL34	Down
0.000185844	0.124744	0.346	0.268	1	CD34+ Gran	TMEM243	Up
0.000186592	0.0748086	0.102	0.055	1	CD34+ Gran	MDFI	Up
0.000186763	0.130265	0.366	0.283	1	CD34+ Gran	ADAM28	Up
0.000186789	-0.15748	0.823	0.846	1	CD34+ Gran	RNF181	Down
0.000189113	0.120151	0.403	0.322	1	CD34+ Gran	EFCAB2	Up
0.00019357	-0.224859	0.361	0.438	1	CD34+ Gran	AL355922.1	Down
0.000200849	-0.136954	0.868	0.893	1	CD34+ Gran	MT-TC	Down
0.000204715	0.163139	0.609	0.538	1	CD34+ Gran	PAK1	Up
0.000206056	0.122052	0.409	0.331	1	CD34+ Gran	GATA2	Up
0.000207387	-0.0837036	1	1	1	CD34+ Gran	RPL30	Down
0.000208984	-0.159524	0.998	0.996	1	CD34+ Gran	NUCB2	Down
0.000211957	-0.125046	0.389	0.48	1	CD34+ Gran	KIF22	Down
0.000216012	0.167909	0.739	0.667	1	CD34+ Gran	TRG-AS1	Up
0.00022588	-0.0931137	1	1	1	CD34+ Gran	RPS11	Down
0.00022755	0.0692167	0.104	0.057	1	CD34+ Gran	HOOK1	Up
0.000237551	0.152844	0.288	0.217	1	CD34+ Gran	AC091271.1	Up
0.000242544	-0.125623	0.63	0.704	1	CD34+ Gran	SC5D	Down
0.000251055	-0.152224	0.926	0.936	1	CD34+ Gran	HSPB1	Down
0.000251724	-0.17858	0.951	0.945	1	CD34+ Gran	MT-TP	Down
0.000252793	0.153673	0.927	0.893	1	CD34+ Gran	FOSB	Up
0.000253056	-0.0864481	1	1	1	CD34+ Gran	RPLP0	Down
0.000254623	-0.0776863	1	1	1	CD34+ Gran	RPL26	Down
0.000256127	0.0663883	0.149	0.092	1	CD34+ Gran	IPCEF1	Up
0.000260134	0.0935114	0.176	0.116	1	CD34+ Gran	EHD4	Up
0.000270832	-0.0912257	1	1	1	CD34+ Gran	RPL27A	Down
0.00027142	0.108342	0.439	0.35	1	CD34+ Gran	CMTM3	Up
0.000274766	0.13913	0.471	0.391	1	CD34+ Gran	DSE	Up
0.000279342	-0.164913	0.977	0.979	1	CD34+ Gran	INSIG1	Down
0.000280355	-0.0806243	0.999	1	1	CD34+ Gran	RPL22	Down
0.000281196	0.125788	0.418	0.338	1	CD34+ Gran	NT5DC1	Up
0.000283735	0.0911262	0.215	0.149	1	CD34+ Gran	AL441992.1	Up
0.00028447	-0.135025	0.295	0.371	1	CD34+ Gran	POLE	Down
0.000285491	0.0928014	0.165	0.107	1	CD34+ Gran	ITGA1	Up
0.000287684	0.122627	0.307	0.234	1	CD34+ Gran	MLLT11	Up
0.00029348	0.147995	0.447	0.378	1	CD34+ Gran	SLC35F6	Up
0.000295449	0.12904	0.448	0.368	1	CD34+ Gran	NETO2	Up
0.000296804	0.0793214	0.133	0.081	1	CD34+ Gran	NAP1L4P1	Up
0.0002972	0.161508	0.335	0.264	1	CD34+ Gran	STAB1	Up
0.000300171	-0.0733601	1	1	1	CD34+ Gran	RPL11	Down
0.000301238	0.0756159	0.128	0.077	1	CD34+ Gran	VIM-AS1	Up
0.000301609	0.165177	0.879	0.82	1	CD34+ Gran	ITM2A	Up
0.000308116	0.128541	0.753	0.704	1	CD34+ Gran	PSMB8	Up
0.000308304	-0.0962882	0.996	0.991	1	CD34+ Gran	AC243919.1	Down
0.000319074	-0.112192	0.239	0.314	1	CD34+ Gran	TTLL12	Down
0.000324655	-0.172676	0.264	0.339	1	CD34+ Gran	AC109326.1	Down
0.000331282	-0.0864455	1	1	1	CD34+ Gran	RPL35A	Down
0.000335285	0.137938	0.71	0.637	1	CD34+ Gran	PARP14	Up
0.000340658	-0.0808468	1	1	1	CD34+ Gran	RPS21	Down
0.000343874	-0.151846	0.831	0.87	1	CD34+ Gran	ACLY	Down
0.000348524	-0.0920463	0.999	1	1	CD34+ Gran	RPL6	Down
0.000354681	0.100305	0.165	0.109	1	CD34+ Gran	FZD2	Up
0.000356428	0.102066	0.234	0.169	1	CD34+ Gran	P3H4	Up
0.000361343	0.118035	0.49	0.405	1	CD34+ Gran	DNAJC12	Up
0.000365118	-0.127565	0.287	0.361	1	CD34+ Gran	CEACAM4	Down
0.000375841	0.0691287	0.102	0.057	1	CD34+ Gran	PDGFD	Up
0.000379098	0.0996144	0.253	0.185	1	CD34+ Gran	ADGRG3	Up
0.000379109	-0.0840116	0.999	1	1	CD34+ Gran	RPS25	Down
0.000379883	0.10226	0.254	0.188	1	CD34+ Gran	AL356599.1	Up
0.000380476	0.155433	0.867	0.803	1	CD34+ Gran	PTEN	Up
0.000386026	0.101984	0.292	0.218	1	CD34+ Gran	MTURN	Up
0.000386902	-0.0984928	0.212	0.284	1	CD34+ Gran	SH3BP1	Down
0.000388143	0.0914733	0.129	0.079	1	CD34+ Gran	TRBC2	Up
0.000388519	0.104523	0.377	0.296	1	CD34+ Gran	WDR54	Up
0.00039057	0.115322	0.208	0.148	1	CD34+ Gran	CD86	Up
0.000399589	0.0799085	0.136	0.084	1	CD34+ Gran	AC007613.1	Up
0.000409175	0.112119	0.465	0.39	1	CD34+ Gran	PLAUR	Up
0.000410395	-0.113282	1	1	1	CD34+ Gran	MT-ND4	Down
0.000414099	-0.171307	0.864	0.891	1	CD34+ Gran	FDPS	Down
0.000419628	0.1421	0.457	0.384	1	CD34+ Gran	SHISA5	Up
0.000424679	0.14857	0.468	0.404	1	CD34+ Gran	LRP10	Up
0.000428834	0.124783	0.311	0.24	1	CD34+ Gran	RGS2	Up
0.000439536	0.0744302	0.139	0.087	1	CD34+ Gran	FSTL1	Up
0.000439552	0.0753969	0.159	0.103	1	CD34+ Gran	PRUNE2	Up
0.000441485	-0.185344	0.545	0.591	1	CD34+ Gran	TMEM107	Down
0.000449411	0.157218	0.293	0.223	1	CD34+ Gran	CXCL3	Up
0.000451165	0.0754497	0.115	0.068	1	CD34+ Gran	AL121603.2	Up
0.000454352	-0.128579	0.383	0.451	1	CD34+ Gran	CRELD2	Down
0.000457831	0.0939416	0.132	0.082	1	CD34+ Gran	NRXN2	Up
0.000458649	-0.14256	0.492	0.577	1	CD34+ Gran	MTHFR	Down
0.000459655	0.0778306	0.115	0.068	1	CD34+ Gran	IGFBP4	Up
0.000477208	-0.0746027	1	1	1	CD34+ Gran	RPL14	Down
0.000479897	0.0707962	0.101	0.057	1	CD34+ Gran	AC099489.1	Up
0.000480217	-0.108153	0.142	0.201	1	CD34+ Gran	AC015799.1	Down
0.000489893	0.104656	0.2	0.14	1	CD34+ Gran	RGS1	Up
0.000494138	0.0635219	0.122	0.073	1	CD34+ Gran	LINC01118	Up
0.000494249	0.104859	0.252	0.185	1	CD34+ Gran	SLC1A3	Up
0.00049606	0.156559	0.461	0.404	1	CD34+ Gran	SLITRK5	Up
0.00049712	-0.111735	0.212	0.28	1	CD34+ Gran	AC096667.1	Down
0.00049958	0.11875	0.335	0.266	1	CD34+ Gran	FHL1	Up
0.000500143	0.0961688	0.111	0.066	1	CD34+ Gran	THSD7A	Up
0.000503827	0.131663	0.992	0.988	1	CD34+ Gran	KLF6	Up
0.000504877	-0.108387	0.356	0.434	1	CD34+ Gran	VEGFA	Down
0.0005084	0.155309	0.567	0.49	1	CD34+ Gran	RCN1	Up
0.000509631	0.122687	0.581	0.508	1	CD34+ Gran	CD58	Up
0.000510643	-0.12563	0.907	0.942	1	CD34+ Gran	SSR1	Down
0.000518384	0.0614708	0.109	0.064	1	CD34+ Gran	KLHDC7B	Up
0.000518917	0.0800396	0.196	0.135	1	CD34+ Gran	SALL4	Up
0.00052193	0.102216	0.255	0.19	1	CD34+ Gran	BX284668.5	Up
0.000533757	0.158302	0.426	0.367	1	CD34+ Gran	PSMB9	Up
0.000535889	0.16008	0.539	0.481	1	CD34+ Gran	RNF13	Up
0.000536387	-0.138397	0.974	0.981	1	CD34+ Gran	UBL5	Down
0.000543849	0.112386	0.231	0.169	1	CD34+ Gran	RFTN1	Up
0.000548949	0.0727043	0.121	0.073	1	CD34+ Gran	IL1RN	Up
0.000553213	0.116604	0.286	0.22	1	CD34+ Gran	BIN1	Up
0.000556152	-0.576637	0.918	0.917	1	CD34+ Gran	ELANE	Down
0.000564503	0.11408	0.166	0.112	1	CD34+ Gran	CCL3	Up
0.000572246	0.120461	0.984	0.97	1	CD34+ Gran	BTN3A2	Up
0.00058441	0.0831787	0.175	0.118	1	CD34+ Gran	HLCS	Up
0.000592267	0.109503	0.907	0.871	1	CD34+ Gran	JUN	Up
0.000606065	0.140237	0.656	0.592	1	CD34+ Gran	ADA2	Up
0.00061669	0.0843782	0.179	0.122	1	CD34+ Gran	SCD5	Up
0.000617208	0.150624	0.476	0.411	1	CD34+ Gran	TMEM263	Up
0.000617319	-0.0921264	1	1	1	CD34+ Gran	RPS5	Down
0.000627141	-0.172744	0.568	0.609	1	CD34+ Gran	CYFIP2	Down
0.000632595	0.0887372	0.201	0.141	1	CD34+ Gran	BAG3	Up
0.000633061	0.133144	0.738	0.681	1	CD34+ Gran	GNPTAB	Up
0.000641593	-0.171161	0.929	0.938	1	CD34+ Gran	ZFP36L2	Down
0.00065076	-0.126925	0.786	0.822	1	CD34+ Gran	MFSD10	Down
0.000653367	0.11144	0.861	0.814	1	CD34+ Gran	GRN	Up
0.000677409	0.093019	0.459	0.38	1	CD34+ Gran	ALS2	Up
0.000689536	0.0934498	0.231	0.168	1	CD34+ Gran	PCNX2	Up
0.000691081	0.0841866	0.182	0.125	1	CD34+ Gran	TPST1	Up
0.00070409	0.186623	0.798	0.764	1	CD34+ Gran	IQGAP2	Up
0.000724962	0.119205	0.436	0.357	1	CD34+ Gran	GNL1	Up
0.000726016	-0.220637	0.94	0.933	1	CD34+ Gran	CFD	Down
0.000726882	-0.0912027	0.128	0.184	1	CD34+ Gran	HIST1H3F	Down
0.000736245	-0.0856216	0.182	0.247	1	CD34+ Gran	CORO7	Down
0.000750933	-0.0826875	0.114	0.168	1	CD34+ Gran	ZMIZ2	Down
0.000751847	0.107235	0.367	0.295	1	CD34+ Gran	LRRC8C	Up
0.000766766	0.0759869	0.122	0.076	1	CD34+ Gran	LHFPL2	Up
0.000766924	0.12754	0.361	0.291	1	CD34+ Gran	IL6ST	Up
0.000769696	0.14411	0.438	0.379	1	CD34+ Gran	TAB2	Up
0.00077313	0.10044	0.334	0.259	1	CD34+ Gran	TMIGD2	Up
0.000773837	-0.114929	0.595	0.656	1	CD34+ Gran	MBP	Down
0.000774699	-0.061531	1	1	1	CD34+ Gran	UBA52	Down
0.000799609	-0.118203	0.962	0.974	1	CD34+ Gran	CLIC1	Down
0.000799769	0.127552	0.798	0.735	1	CD34+ Gran	C4orf48	Up
0.000805643	0.163653	0.566	0.518	1	CD34+ Gran	RAB31	Up
0.000806175	-0.12257	0.818	0.821	1	CD34+ Gran	SMCHD1	Down
0.000813129	-0.150496	0.749	0.783	1	CD34+ Gran	CTSD	Down
0.000819298	-0.0721811	1	1	1	CD34+ Gran	FAU	Down
0.000822	-0.086748	0.163	0.225	1	CD34+ Gran	HSD17B8	Down
0.00082768	0.127459	0.35	0.284	1	CD34+ Gran	CASC15	Up
0.00083795	-0.137789	0.913	0.913	1	CD34+ Gran	ELF1	Down
0.000839332	-0.093223	0.232	0.302	1	CD34+ Gran	AC093323.1	Down
0.000839714	-0.130938	0.524	0.598	1	CD34+ Gran	CPD	Down
0.000849401	0.0960891	0.189	0.134	1	CD34+ Gran	SUN1	Up
0.000850445	0.0875808	0.222	0.161	1	CD34+ Gran	FOXM1	Up
0.000852277	0.107949	0.41	0.336	1	CD34+ Gran	TMEM45A	Up
0.000870559	-0.119442	0.961	0.956	1	CD34+ Gran	COX8A	Down
0.000871815	0.0760124	0.21	0.148	1	CD34+ Gran	SCN1A-AS1	Up
0.000873192	-0.167722	0.274	0.34	1	CD34+ Gran	SPATC1L	Down
0.000880166	0.0683437	0.108	0.065	1	CD34+ Gran	KHDRBS2	Up
0.000884458	0.126695	0.259	0.201	1	CD34+ Gran	FARP1	Up
0.000892835	-0.0670362	1	1	1	CD34+ Gran	RPS13	Down
0.00089887	0.134446	0.421	0.355	1	CD34+ Gran	GLTP	Up
0.000918938	0.107226	0.218	0.16	1	CD34+ Gran	CA5BP1	Up
0.000934616	-0.115576	0.306	0.376	1	CD34+ Gran	CTNNBIP1	Down
0.000939307	0.0636381	0.535	0.44	1	CD34+ Gran	GPR183	Up
0.0009412	-0.10997	0.723	0.781	1	CD34+ Gran	SUCLG1	Down
0.000943429	0.10503	0.528	0.455	1	CD34+ Gran	PICALM	Up
0.00096242	-0.0864479	0.169	0.231	1	CD34+ Gran	KANSL3	Down
0.000965738	0.127078	0.363	0.295	1	CD34+ Gran	GATM	Up
0.000967416	0.0879546	0.153	0.102	1	CD34+ Gran	MT1X	Up
0.000984799	0.0807539	0.295	0.225	1	CD34+ Gran	ANGPT1	Up
0.000990925	0.114684	0.31	0.242	1	CD34+ Gran	POMC	Up
0.00101939	-0.0616699	1	1	1	CD34+ Gran	RPL13	Down
0.00102283	0.266568	0.419	0.35	1	CD34+ Gran	S100A8	Up
0.00102854	0.0680852	0.116	0.071	1	CD34+ Gran	KIAA0513	Up
0.00104079	0.0803067	0.18	0.125	1	CD34+ Gran	PIK3C2B	Up
0.00104119	-0.138431	0.548	0.62	1	CD34+ Gran	LIMD2	Down
0.00104403	0.138478	0.663	0.62	1	CD34+ Gran	MCTP2	Up
0.00104714	0.169423	0.464	0.405	1	CD34+ Gran	CCDC26	Up
0.00104923	-0.117753	0.519	0.579	1	CD34+ Gran	SMIM3	Down
0.00105402	0.0990804	0.758	0.67	1	CD34+ Gran	ZFP36	Up
0.0010779	-0.152699	0.958	0.945	1	CD34+ Gran	SQLE	Down
0.00108037	-0.174666	0.517	0.573	1	CD34+ Gran	HIST2H2AC	Down
0.00109343	-0.109587	0.352	0.43	1	CD34+ Gran	SNRNP48	Down
0.00110776	-0.108233	0.99	0.989	1	CD34+ Gran	UQCRH	Down
0.00111029	0.0731861	0.15	0.1	1	CD34+ Gran	NYNRIN	Up
0.00111551	-0.129407	0.991	0.992	1	CD34+ Gran	FDFT1	Down
0.00111732	-0.0696696	1	1	1	CD34+ Gran	RPS18	Down
0.00111929	-0.132197	0.615	0.67	1	CD34+ Gran	GAPT	Down
0.00112724	0.108445	0.221	0.163	1	CD34+ Gran	OPTN	Up
0.00113507	0.086244	0.274	0.208	1	CD34+ Gran	ITGAX	Up
0.00114075	-0.106458	0.274	0.341	1	CD34+ Gran	MAN2B2	Down
0.00114108	0.122222	0.532	0.462	1	CD34+ Gran	AIG1	Up
0.00114847	0.152551	0.646	0.587	1	CD34+ Gran	PPDPF	Up
0.00114957	-0.117832	0.198	0.261	1	CD34+ Gran	HIST1H2AL	Down
0.00115115	0.0691971	0.134	0.087	1	CD34+ Gran	PAPSS2	Up
0.00115612	-0.110344	0.263	0.33	1	CD34+ Gran	TBXAS1	Down
0.00115832	0.0904396	0.222	0.163	1	CD34+ Gran	SLC23A2	Up
0.00116544	0.116823	0.421	0.348	1	CD34+ Gran	UBASH3B	Up
0.00116647	-0.0825489	0.069	0.112	1	CD34+ Gran	MFAP4	Down
0.00116891	0.145762	0.458	0.401	1	CD34+ Gran	CRYBG1	Up
0.00117706	0.13247	0.654	0.609	1	CD34+ Gran	CHPT1	Up
0.00118048	0.0856479	0.105	0.064	1	CD34+ Gran	ADAMTS1	Up
0.00119929	0.0991678	0.601	0.516	1	CD34+ Gran	SLC2A3	Up
0.0012109	0.115267	0.372	0.305	1	CD34+ Gran	PRDM8	Up
0.00122066	-0.251887	0.909	0.929	1	CD34+ Gran	IER2	Down
0.00123555	0.0914565	0.254	0.191	1	CD34+ Gran	TSPAN33	Up
0.00124485	0.116481	0.921	0.88	1	CD34+ Gran	EIF4A2	Up
0.00125548	0.128855	0.354	0.286	1	CD34+ Gran	MCUB	Up
0.00127152	0.07026	0.1	0.059	1	CD34+ Gran	PRTG	Up
0.00127801	0.134016	0.387	0.32	1	CD34+ Gran	DPYD	Up
0.00129086	-0.077921	0.105	0.155	1	CD34+ Gran	ABITRAM	Down
0.00129876	0.130004	0.321	0.262	1	CD34+ Gran	SOCS3	Up
0.00130959	0.0500589	0.102	0.06	1	CD34+ Gran	FPR2	Up
0.00132203	0.115341	0.373	0.307	1	CD34+ Gran	DOCK10	Up
0.00132786	-0.103968	0.564	0.636	1	CD34+ Gran	TM7SF2	Down
0.00133248	0.0644241	0.104	0.062	1	CD34+ Gran	DYNC2H1	Up
0.00134648	-0.119865	0.999	0.997	1	CD34+ Gran	GNAS	Down
0.00134858	0.0827719	0.195	0.139	1	CD34+ Gran	LINC02754	Up
0.0013519	0.100974	0.508	0.435	1	CD34+ Gran	SULT1A1	Up
0.00137555	0.138912	0.383	0.319	1	CD34+ Gran	NRIP3	Up
0.00138124	0.0689474	0.122	0.078	1	CD34+ Gran	STARD13	Up
0.00140556	-0.141899	0.872	0.897	1	CD34+ Gran	CEBPD	Down
0.00143512	0.0733484	0.129	0.083	1	CD34+ Gran	BIRC3	Up
0.00143735	-0.0656872	1	1	1	CD34+ Gran	RPL38	Down
0.00147045	0.0800639	0.215	0.157	1	CD34+ Gran	SH2D4A	Up
0.00147071	-0.0847838	0.114	0.164	1	CD34+ Gran	OGN	Down
0.00147271	-0.05352	0.063	0.104	1	CD34+ Gran	PHF13	Down
0.00148415	0.109488	0.366	0.302	1	CD34+ Gran	LMNA	Up
0.00149928	0.0796521	0.167	0.115	1	CD34+ Gran	SLC30A4	Up
0.00152066	-0.134497	0.646	0.712	1	CD34+ Gran	M6PR	Down
0.00152394	0.0699062	0.108	0.067	1	CD34+ Gran	ZDHHC15	Up
0.00152826	0.0846818	0.337	0.265	1	CD34+ Gran	EMP2	Up
0.00154098	0.104328	0.553	0.485	1	CD34+ Gran	WDFY2	Up
0.0015582	0.104736	0.515	0.446	1	CD34+ Gran	CD33	Up
0.00157679	0.092774	0.355	0.283	1	CD34+ Gran	YBEY	Up
0.00157684	-0.115375	0.636	0.686	1	CD34+ Gran	STT3A	Down
0.00159626	0.105175	0.259	0.198	1	CD34+ Gran	PADI4	Up
0.00160977	0.0733747	0.167	0.115	1	CD34+ Gran	PBX1	Up
0.00165856	0.0868979	0.262	0.201	1	CD34+ Gran	GMPR	Up
0.00166079	0.0961178	0.193	0.139	1	CD34+ Gran	CYP1B1	Up
0.001672	0.115644	0.358	0.294	1	CD34+ Gran	PROM1	Up
0.0016779	0.074896	0.245	0.183	1	CD34+ Gran	VAPB	Up
0.00170555	0.0751171	0.176	0.125	1	CD34+ Gran	TEN1	Up
0.00172132	-0.120179	0.263	0.329	1	CD34+ Gran	HIST1H2AJ	Down
0.00172864	0.0805826	0.162	0.113	1	CD34+ Gran	CRIP1	Up
0.00172964	0.0736615	0.207	0.15	1	CD34+ Gran	PDE8A	Up
0.00173163	-0.111213	0.945	0.941	1	CD34+ Gran	NDUFB9	Down
0.00174603	-0.106216	0.437	0.509	1	CD34+ Gran	LINC00926	Down
0.00174673	-0.104093	0.803	0.83	1	CD34+ Gran	ARPC4	Down
0.00176324	-0.101055	0.553	0.632	1	CD34+ Gran	LARP4B	Down
0.00177547	0.056178	0.103	0.062	1	CD34+ Gran	YPEL1	Up
0.0017777	-0.0798644	0.134	0.188	1	CD34+ Gran	LRRC37A4P	Down
0.00177914	-0.09951	1	1	1	CD34+ Gran	RPS4X	Down
0.00178043	0.13092	0.663	0.596	1	CD34+ Gran	THUMPD3-AS1	Up
0.00181342	-0.121695	0.65	0.707	1	CD34+ Gran	CIB1	Down
0.0018563	0.0973704	0.289	0.225	1	CD34+ Gran	TREM1	Up
0.00185697	-0.0523649	1	1	1	CD34+ Gran	RPL19	Down
0.00187116	-0.081003	0.997	0.996	1	CD34+ Gran	EIF3E	Down
0.00187414	0.131814	0.706	0.657	1	CD34+ Gran	PLSCR1	Up
0.00188494	-0.0872953	0.996	0.999	1	CD34+ Gran	TOMM7	Down
0.00193307	-0.176982	0.845	0.867	1	CD34+ Gran	KDM5B	Down
0.00193323	-0.309571	0.402	0.459	1	CD34+ Gran	RETN	Down
0.00194863	0.116044	0.832	0.804	1	CD34+ Gran	DNAJC15	Up
0.00195601	0.104819	0.175	0.126	1	CD34+ Gran	AC009318.1	Up
0.0019593	-0.0906129	0.803	0.849	1	CD34+ Gran	NENF	Down
0.00197789	-0.137772	0.897	0.898	1	CD34+ Gran	CSF3R	Down
0.00198008	0.0899101	0.237	0.178	1	CD34+ Gran	SIRPB2	Up
0.00198902	0.0637606	0.149	0.101	1	CD34+ Gran	AC007384.1	Up
0.00200017	-0.0634384	1	1	1	CD34+ Gran	RPL15	Down
0.00204744	-0.0820344	0.172	0.231	1	CD34+ Gran	TRMU	Down
0.00205995	-0.109672	0.86	0.877	1	CD34+ Gran	TENT5A	Down
0.00207415	0.133831	0.464	0.405	1	CD34+ Gran	CBR1	Up
0.00207452	-0.10873	0.327	0.391	1	CD34+ Gran	GPR160	Down
0.00208069	-0.116696	0.921	0.925	1	CD34+ Gran	CNBP	Down
0.00208121	0.0965167	0.225	0.17	1	CD34+ Gran	P3H3	Up
0.00209105	-0.0750491	1	1	1	CD34+ Gran	RPL8	Down
0.0021128	-0.125138	0.924	0.927	1	CD34+ Gran	ROMO1	Down
0.00211767	-0.0699188	1	1	1	CD34+ Gran	RPL37A	Down
0.00213757	0.0955346	0.256	0.198	1	CD34+ Gran	NAPEPLD	Up
0.00220078	-0.130467	0.615	0.669	1	CD34+ Gran	MRPL16	Down
0.00220241	0.0694405	0.143	0.096	1	CD34+ Gran	AC027031.2	Up
0.00221459	-0.177624	0.538	0.589	1	CD34+ Gran	AC004687.1	Down
0.00223386	-0.0718204	0.119	0.169	1	CD34+ Gran	SPIN2B	Down
0.00223863	0.126897	0.916	0.889	1	CD34+ Gran	EMB	Up
0.00223938	-0.115651	0.814	0.842	1	CD34+ Gran	SH3KBP1	Down
0.00224292	0.0758222	0.159	0.111	1	CD34+ Gran	AC023051.1	Up
0.00225216	0.131886	0.339	0.281	1	CD34+ Gran	RPL39L	Up
0.0022619	0.0746053	0.147	0.101	1	CD34+ Gran	ZDHHC19	Up
0.00227247	-0.0630407	0.098	0.146	1	CD34+ Gran	MAN2A2	Down
0.00232054	0.117912	0.843	0.8	1	CD34+ Gran	C9orf16	Up
0.0023289	0.0871096	0.221	0.166	1	CD34+ Gran	2025-03-08	Up
0.00235972	0.078199	0.184	0.133	1	CD34+ Gran	PITPNC1	Up
0.00235977	-0.091226	0.975	0.974	1	CD34+ Gran	H2AFY	Down
0.00238833	-0.115784	0.226	0.284	1	CD34+ Gran	TMC6	Down
0.00240003	-0.153765	0.738	0.787	1	CD34+ Gran	HIST1H1C	Down
0.00241358	-0.0766538	0.983	0.984	1	CD34+ Gran	ACTR2	Down
0.00244736	0.0864264	0.307	0.242	1	CD34+ Gran	ZDHHC9	Up
0.00245266	0.138463	0.794	0.753	1	CD34+ Gran	BIRC6	Up
0.00245744	0.128771	0.851	0.772	1	CD34+ Gran	KCNQ1OT1	Up
0.00247233	0.0848149	0.241	0.184	1	CD34+ Gran	GZF1	Up
0.00247542	-0.063554	0.094	0.139	1	CD34+ Gran	HSDL1	Down
0.00249144	0.112549	0.675	0.618	1	CD34+ Gran	TFPI	Up
0.00251817	-0.0539544	1	1	1	CD34+ Gran	RPS15A	Down
0.00253038	0.0849948	0.242	0.186	1	CD34+ Gran	LRRC61	Up
0.00254445	-0.10651	0.829	0.886	1	CD34+ Gran	ARPC1B	Down
0.00256573	-0.0954604	0.274	0.336	1	CD34+ Gran	GPAA1	Down
0.00259533	0.0955156	0.394	0.326	1	CD34+ Gran	STAP1	Up
0.00260553	0.103901	0.33	0.269	1	CD34+ Gran	AUTS2	Up
0.00262409	0.107804	0.905	0.861	1	CD34+ Gran	BST2	Up
0.00264317	0.106759	0.421	0.355	1	CD34+ Gran	DUSP10	Up
0.00266383	-0.0963201	0.991	0.991	1	CD34+ Gran	CANX	Down
0.00266887	0.0947805	0.366	0.303	1	CD34+ Gran	STIM2	Up
0.00267541	-0.0943841	0.194	0.249	1	CD34+ Gran	CNNM3	Down
0.00268187	-0.094215	0.874	0.897	1	CD34+ Gran	TMEM59	Down
0.00269237	0.0862719	0.238	0.182	1	CD34+ Gran	TSPAN7	Up
0.00269513	0.124431	0.373	0.314	1	CD34+ Gran	ANXA3	Up
0.00276783	0.0854014	0.382	0.315	1	CD34+ Gran	MAGEF1	Up
0.00276883	-0.124672	0.49	0.546	1	CD34+ Gran	KCTD20	Down
0.00277624	0.0896026	0.394	0.325	1	CD34+ Gran	PXDN	Up
0.00278967	0.0838762	0.25	0.193	1	CD34+ Gran	CASK	Up
0.00279249	0.125931	0.534	0.478	1	CD34+ Gran	SPTAN1	Up
0.00281493	0.120715	0.6	0.537	1	CD34+ Gran	SERPINB8	Up
0.0028216	-0.102197	0.327	0.386	1	CD34+ Gran	GNG7	Down
0.00282409	-0.0979461	0.998	0.995	1	CD34+ Gran	ATP5MPL	Down
0.00286991	-0.0892084	1	1	1	CD34+ Gran	MT-CO3	Down
0.00288125	0.0886466	0.169	0.121	1	CD34+ Gran	AC092944.1	Up
0.00288952	0.0778306	0.111	0.072	1	CD34+ Gran	DYSF	Up
0.00289055	0.0572032	0.106	0.067	1	CD34+ Gran	LHFPL6	Up
0.00289604	0.10286	0.379	0.315	1	CD34+ Gran	IMPDH1	Up
0.0029247	-0.0967358	0.25	0.31	1	CD34+ Gran	MGAT4B	Down
0.00294303	0.0861796	0.22	0.167	1	CD34+ Gran	TSPAN13	Up
0.00297545	0.107288	0.873	0.82	1	CD34+ Gran	ZNF706	Up
0.00298323	0.105971	0.147	0.103	1	CD34+ Gran	EPGN	Up
0.00302596	-0.159519	0.655	0.694	1	CD34+ Gran	ITGB2	Down
0.00303252	0.089924	0.323	0.259	1	CD34+ Gran	DSC2	Up
0.00304214	0.111801	0.357	0.297	1	CD34+ Gran	SCML1	Up
0.00304249	0.125918	0.458	0.402	1	CD34+ Gran	ERAP2	Up
0.00306325	-0.101214	1	1	1	CD34+ Gran	MT-ND1	Down
0.00306866	0.075645	0.161	0.114	1	CD34+ Gran	LAX1	Up
0.003073	0.0654869	0.192	0.138	1	CD34+ Gran	RASSF5	Up
0.00308454	0.0817227	0.134	0.091	1	CD34+ Gran	CTHRC1	Up
0.0030914	0.082309	0.192	0.14	1	CD34+ Gran	AC012076.1	Up
0.00310696	-0.0929803	0.237	0.295	1	CD34+ Gran	NUP188	Down
0.00311777	0.103507	0.277	0.223	1	CD34+ Gran	LINC01304	Up
0.00312852	-0.0720979	1	1	1	CD34+ Gran	RPL27	Down
0.00316342	0.074411	0.244	0.186	1	CD34+ Gran	FBLN1	Up
0.00317781	-0.0577133	1	1	1	CD34+ Gran	RPL29	Down
0.00319722	0.0673391	0.142	0.098	1	CD34+ Gran	ZFAND4	Up
0.00320707	-0.0999575	0.235	0.289	1	CD34+ Gran	ZNF672	Down
0.00326011	-0.124674	0.87	0.884	1	CD34+ Gran	C19orf53	Down
0.0032798	0.118819	0.913	0.877	1	CD34+ Gran	PTPRC	Up
0.00329257	-0.121246	0.458	0.509	1	CD34+ Gran	ACADVL	Down
0.00329942	-0.0757383	1	1	1	CD34+ Gran	RPL4	Down
0.00332923	0.107931	0.792	0.755	1	CD34+ Gran	LPCAT2	Up
0.00335188	0.133089	0.829	0.811	1	CD34+ Gran	CPVL	Up
0.00338348	-0.115281	0.49	0.549	1	CD34+ Gran	P2RX1	Down
0.00339558	-0.130458	0.773	0.808	1	CD34+ Gran	RPN1	Down
0.0034425	-0.114537	0.391	0.455	1	CD34+ Gran	SCARB1	Down
0.00346634	0.0706071	0.143	0.099	1	CD34+ Gran	CTSO	Up
0.00346705	0.0651372	0.315	0.249	1	CD34+ Gran	TMEM218	Up
0.00353218	-0.0670428	1	1	1	CD34+ Gran	EEF1A1	Down
0.00355232	0.0696776	0.166	0.118	1	CD34+ Gran	SOX13	Up
0.00355633	0.0806766	0.353	0.285	1	CD34+ Gran	CD79B	Up
0.00356496	-0.0802063	0.189	0.243	1	CD34+ Gran	MROH6	Down
0.00357655	-0.106912	0.747	0.784	1	CD34+ Gran	NRDC	Down
0.00359218	-0.103115	0.436	0.503	1	CD34+ Gran	ING2	Down
0.00359625	0.126019	0.672	0.62	1	CD34+ Gran	CAST	Up
0.00359834	0.0552146	0.117	0.077	1	CD34+ Gran	TRIM46	Up
0.00360001	-0.106411	0.999	0.993	1	CD34+ Gran	PRSS57	Down
0.00360976	0.0663772	0.2	0.148	1	CD34+ Gran	SERTAD1	Up
0.00362209	0.105152	0.495	0.433	1	CD34+ Gran	ERG	Up
0.00363852	0.0464222	0.29	0.225	1	CD34+ Gran	HBEGF	Up
0.0037032	-0.0670619	0.152	0.204	1	CD34+ Gran	TRUB1	Down
0.00373801	0.125934	0.348	0.291	1	CD34+ Gran	MZB1	Up
0.00377021	0.0720278	0.146	0.102	1	CD34+ Gran	INPP5J	Up
0.00377391	0.0704921	0.157	0.111	1	CD34+ Gran	SYT1	Up
0.00379311	-0.0979944	0.231	0.289	1	CD34+ Gran	BRIP1	Down
0.00381556	0.061902	0.113	0.073	1	CD34+ Gran	ST8SIA6	Up
0.00382049	-0.0626568	1	1	1	CD34+ Gran	RACK1	Down
0.00384565	-0.110485	0.931	0.961	1	CD34+ Gran	PRDX5	Down
0.0039066	-0.199985	0.916	0.919	1	CD34+ Gran	DUT	Down
0.00390772	0.0998537	0.696	0.645	1	CD34+ Gran	RGCC	Up
0.00391119	0.0845866	0.234	0.179	1	CD34+ Gran	OTUD1	Up
0.00394557	-0.128114	0.95	0.953	1	CD34+ Gran	CYBA	Down
0.00399874	-0.132375	0.57	0.634	1	CD34+ Gran	MCM3	Down
0.00402538	-0.0640539	0.109	0.155	1	CD34+ Gran	SIGLEC14	Down
0.00402916	0.0813135	0.188	0.139	1	CD34+ Gran	AC097534.2	Up
0.00403993	-0.117076	0.814	0.845	1	CD34+ Gran	UBE2I	Down
0.00404804	0.105219	0.394	0.336	1	CD34+ Gran	RNPEP	Up
0.00407115	-0.0832647	0.68	0.727	1	CD34+ Gran	ACADM	Down
0.00408634	-0.0698509	1	0.997	1	CD34+ Gran	RPL3	Down
0.00412903	-0.108801	0.598	0.639	1	CD34+ Gran	PAN3	Down
0.00415491	0.0531467	0.102	0.065	1	CD34+ Gran	AC093827.4	Up
0.00417135	0.082363	0.317	0.257	1	CD34+ Gran	GAA	Up
0.00419134	-0.116376	0.312	0.366	1	CD34+ Gran	SREBF1	Down
0.0041967	0.118899	0.746	0.689	1	CD34+ Gran	NFKBIA	Up
0.00420266	-0.0820128	0.439	0.509	1	CD34+ Gran	MRPL55	Down
0.0042271	-0.113309	0.341	0.4	1	CD34+ Gran	GNPDA1	Down
0.0042823	-0.0649322	0.209	0.269	1	CD34+ Gran	RNF214	Down
0.00434803	0.0627186	0.129	0.088	1	CD34+ Gran	SGSH	Up
0.00435778	0.0636792	0.182	0.133	1	CD34+ Gran	OXNAD1	Up
0.00438552	-0.118202	0.431	0.485	1	CD34+ Gran	PGRMC1	Down
0.00438599	0.0983845	0.306	0.248	1	CD34+ Gran	FNBP1L	Up
0.00440727	0.057738	0.158	0.112	1	CD34+ Gran	MAP2K6	Up
0.00440873	-0.106738	0.608	0.666	1	CD34+ Gran	EFTUD2	Down
0.00441192	-0.17633	0.853	0.875	1	CD34+ Gran	H1FX	Down
0.00441356	0.0566025	0.115	0.076	1	CD34+ Gran	SGPP1	Up
0.00442063	0.0689474	0.119	0.08	1	CD34+ Gran	GASAL1	Up
0.00442082	-0.0612549	1	1	1	CD34+ Gran	RPL10	Down
0.00442387	-0.10475	0.93	0.946	1	CD34+ Gran	H2AFV	Down
0.00443164	0.0995222	0.377	0.312	1	CD34+ Gran	HK1	Up
0.00447086	0.0780553	0.195	0.146	1	CD34+ Gran	P2RY13	Up
0.00448218	0.0928746	0.33	0.27	1	CD34+ Gran	COG6	Up
0.00451377	0.0644482	0.168	0.122	1	CD34+ Gran	DPEP2	Up
0.004514	-0.114798	0.496	0.553	1	CD34+ Gran	GPN3	Down
0.00452572	-0.0798358	0.179	0.232	1	CD34+ Gran	RAB7B	Down
0.00456558	0.0906474	0.298	0.24	1	CD34+ Gran	ZSWIM6	Up
0.0045812	0.0944257	0.465	0.407	1	CD34+ Gran	PTPN14	Up
0.00458311	0.0791633	0.198	0.149	1	CD34+ Gran	SH3PXD2A	Up
0.00471011	0.0868885	0.337	0.275	1	CD34+ Gran	PPARA	Up
0.00471032	0.0544776	0.105	0.068	1	CD34+ Gran	LINC02232	Up
0.00471156	0.105561	0.392	0.331	1	CD34+ Gran	EVI5	Up
0.00473428	-0.119532	0.391	0.445	1	CD34+ Gran	RFC4	Down
0.0047385	-0.130516	0.803	0.834	1	CD34+ Gran	CCNG1	Down
0.00474142	0.0736934	0.538	0.474	1	CD34+ Gran	FKBP11	Up
0.00483823	-0.102723	0.714	0.751	1	CD34+ Gran	QARS	Down
0.00484552	-0.0915966	0.281	0.344	1	CD34+ Gran	BORCS7	Down
0.00485659	-0.0820529	0.2	0.255	1	CD34+ Gran	GALK2	Down
0.00487312	-0.0623889	0.089	0.129	1	CD34+ Gran	AL844892.2	Down
0.00489517	0.094757	0.192	0.145	1	CD34+ Gran	GUCY1A1	Up
0.00489604	0.121939	0.537	0.482	1	CD34+ Gran	TMCO3	Up
0.00489934	0.100259	0.504	0.44	1	CD34+ Gran	CLDND1	Up
0.00497934	0.0643584	0.186	0.138	1	CD34+ Gran	PFKFB3	Up
0.00501714	-0.0618981	1	1	1	CD34+ Gran	RPL13A	Down
0.00503273	0.051251	0.11	0.072	1	CD34+ Gran	LGR4	Up
0.00505012	-0.0953037	0.256	0.315	1	CD34+ Gran	WDHD1	Down
0.00505528	0.114645	0.287	0.232	1	CD34+ Gran	JAML	Up
0.00511559	0.0865367	0.461	0.4	1	CD34+ Gran	PRNP	Up
0.00512089	0.0883774	0.34	0.279	1	CD34+ Gran	RASGRP3	Up
0.00515161	-0.0564361	1	1	1	CD34+ Gran	RPS15	Down
0.00515942	0.0656629	0.141	0.099	1	CD34+ Gran	PI4K2A	Up
0.00520752	0.107518	0.437	0.38	1	CD34+ Gran	AHI1	Up
0.00521036	0.101095	0.295	0.242	1	CD34+ Gran	SASH3	Up
0.00523018	0.086064	0.216	0.167	1	CD34+ Gran	DPH7	Up
0.00523266	-0.102563	0.682	0.727	1	CD34+ Gran	NUDT21	Down
0.00524203	-0.0952638	0.357	0.414	1	CD34+ Gran	PLAGL2	Down
0.00527964	-0.0692227	1	1	1	CD34+ Gran	RPS16	Down
0.00529631	0.129919	0.556	0.493	1	CD34+ Gran	RB1	Up
0.00534826	0.0614601	0.175	0.128	1	CD34+ Gran	PLCL2	Up
0.00536853	-0.0597412	1	1	1	CD34+ Gran	RPS7	Down
0.00539938	0.0827547	0.228	0.178	1	CD34+ Gran	PFKM	Up
0.00542478	-0.103089	0.754	0.804	1	CD34+ Gran	PPIP5K2	Down
0.00543875	-0.155924	0.381	0.433	1	CD34+ Gran	H1F0	Down
0.00549367	-0.0876443	0.904	0.932	1	CD34+ Gran	TESC	Down
0.00552974	0.0568266	0.109	0.072	1	CD34+ Gran	DUSP4	Up
0.00556077	0.090607	0.404	0.344	1	CD34+ Gran	MYLIP	Up
0.00558191	-0.120579	0.562	0.605	1	CD34+ Gran	PNP	Down
0.00560064	0.0518755	0.119	0.08	1	CD34+ Gran	PIR	Up
0.00562858	-0.133647	0.59	0.62	1	CD34+ Gran	RUSC1-AS1	Down
0.00566166	-0.0923055	0.79	0.811	1	CD34+ Gran	GSTK1	Down
0.00580838	0.0686038	0.148	0.106	1	CD34+ Gran	SIPA1L2	Up
0.00584267	-0.0660966	0.999	0.999	1	CD34+ Gran	RPL10A	Down
0.00585925	0.0910915	0.293	0.239	1	CD34+ Gran	GPR155	Up
0.00586041	-0.0818902	1	0.998	1	CD34+ Gran	MT-ATP8	Down
0.00591856	0.0827345	0.333	0.275	1	CD34+ Gran	MYEF2	Up
0.00592065	0.0992302	0.345	0.289	1	CD34+ Gran	FAM135A	Up
0.00596857	-0.0821943	0.557	0.615	1	CD34+ Gran	GATAD2A	Down
0.00597098	0.0885814	0.291	0.24	1	CD34+ Gran	STX11	Up
0.00597191	0.0794205	0.265	0.211	1	CD34+ Gran	MTM1	Up
0.00597529	0.0760526	0.503	0.432	1	CD34+ Gran	AGFG1	Up
0.00597535	0.0487909	0.104	0.068	1	CD34+ Gran	ZKSCAN2-DT	Up
0.0059773	-0.117193	0.474	0.526	1	CD34+ Gran	SELPLG	Down
0.00600306	0.0777878	0.622	0.557	1	CD34+ Gran	CLPB	Up
0.00603047	-0.0911025	0.75	0.802	1	CD34+ Gran	NCOR1	Down
0.00604855	0.0722606	0.172	0.127	1	CD34+ Gran	HOMER2	Up
0.00606065	0.131746	0.453	0.398	1	CD34+ Gran	SP110	Up
0.00606625	-0.135131	0.503	0.557	1	CD34+ Gran	MCM5	Down
0.0060969	0.0794345	0.139	0.099	1	CD34+ Gran	FAM49A	Up
0.00609785	-0.0489312	0.073	0.11	1	CD34+ Gran	ORMDL3	Down
0.00611763	0.0979399	0.199	0.151	1	CD34+ Gran	HLA-DQA1	Up
0.00612689	0.0933964	0.694	0.647	1	CD34+ Gran	TNRC18	Up
0.00616172	0.0542857	0.214	0.16	1	CD34+ Gran	C17orf58	Up
0.00618812	0.0730635	0.2	0.152	1	CD34+ Gran	MELTF	Up
0.00622816	0.0575906	0.843	0.773	1	CD34+ Gran	IFITM3	Up
0.00623209	0.0708781	0.17	0.125	1	CD34+ Gran	HLA-DRB6	Up
0.00623862	-0.127186	0.64	0.675	1	CD34+ Gran	NDUFV1	Down
0.00624083	-0.15909	0.872	0.876	1	CD34+ Gran	MLEC	Down
0.00624597	0.0668708	0.155	0.112	1	CD34+ Gran	AC118344.2	Up
0.00628299	-0.212918	0.976	0.977	1	CD34+ Gran	CST7	Down
0.00629139	0.115766	0.306	0.257	1	CD34+ Gran	SGPL1	Up
0.00635924	-0.109836	0.736	0.772	1	CD34+ Gran	HM13	Down
0.00636266	0.106525	0.57	0.508	1	CD34+ Gran	OARD1	Up
0.00638503	0.115867	0.814	0.774	1	CD34+ Gran	FCER1G	Up
0.00646864	0.0755198	0.195	0.147	1	CD34+ Gran	TPD52L1	Up
0.00646903	0.0912224	0.383	0.32	1	CD34+ Gran	POU2F2	Up
0.00649477	0.138794	0.972	0.95	1	CD34+ Gran	MRPL33	Up
0.00649675	-0.076015	0.207	0.261	1	CD34+ Gran	MCM3AP-AS1	Down
0.00652219	0.0928893	0.295	0.243	1	CD34+ Gran	AC008969.1	Up
0.00653206	0.0980122	0.233	0.184	1	CD34+ Gran	RCBTB2	Up
0.00655794	0.0520733	0.135	0.094	1	CD34+ Gran	LOXL1	Up
0.00659117	0.0906393	0.442	0.383	1	CD34+ Gran	CARD16	Up
0.00663788	0.0937403	0.28	0.229	1	CD34+ Gran	MYD88	Up
0.00664173	0.0654695	0.16	0.116	1	CD34+ Gran	AC027097.2	Up
0.00666501	-0.10457	0.37	0.427	1	CD34+ Gran	PKP4	Down
0.00669621	-0.0968615	0.282	0.337	1	CD34+ Gran	SLC16A3	Down
0.00670354	-0.0624738	0.089	0.127	1	CD34+ Gran	AC018765.1	Down
0.00672134	0.104183	0.829	0.785	1	CD34+ Gran	TMEM165	Up
0.0067519	-0.10443	0.531	0.572	1	CD34+ Gran	CBL	Down
0.00676568	0.103114	0.737	0.696	1	CD34+ Gran	DPPA4	Up
0.00679562	0.0773098	0.127	0.089	1	CD34+ Gran	AC093690.1	Up
0.00680075	0.0982535	0.966	0.965	1	CD34+ Gran	PGD	Up
0.00681477	0.0757123	0.18	0.135	1	CD34+ Gran	PATJ	Up
0.00682725	-0.109657	0.456	0.508	1	CD34+ Gran	NUP107	Down
0.00686972	0.0555015	0.124	0.086	1	CD34+ Gran	GPC2	Up
0.00689998	-0.0711742	0.62	0.685	1	CD34+ Gran	FRG1	Down
0.00690338	-0.0648601	0.198	0.252	1	CD34+ Gran	DGKA	Down
0.00692578	0.0942881	0.35	0.294	1	CD34+ Gran	AFF2	Up
0.00692718	0.0984149	0.437	0.38	1	CD34+ Gran	RCHY1	Up
0.00693531	0.0910814	0.329	0.274	1	CD34+ Gran	BOD1	Up
0.007009	-0.0567067	0.152	0.201	1	CD34+ Gran	F8A1	Down
0.00707026	0.100948	0.636	0.58	1	CD34+ Gran	HOOK3	Up
0.00713269	-0.138544	0.33	0.379	1	CD34+ Gran	HIST1H2AH	Down
0.00714573	-0.11026	0.542	0.595	1	CD34+ Gran	NIPSNAP3A	Down
0.00716822	0.0934553	0.253	0.205	1	CD34+ Gran	LIMK1	Up
0.00727835	0.0782031	0.997	0.997	1	CD34+ Gran	COMMD6	Up
0.0073014	-0.113992	0.858	0.89	1	CD34+ Gran	U2SURP	Down
0.00731914	-0.047491	1	1	1	CD34+ Gran	RPL32	Down
0.00731951	-0.0514684	0.461	0.536	1	CD34+ Gran	SKA2	Down
0.00733066	-0.0927011	0.952	0.962	1	CD34+ Gran	EIF3L	Down
0.0073577	0.0704367	0.147	0.106	1	CD34+ Gran	TRPM4	Up
0.00740481	-0.10965	0.815	0.819	1	CD34+ Gran	TAPBP	Down
0.00744894	0.0568266	0.11	0.075	1	CD34+ Gran	CERKL	Up
0.00746313	0.0803427	0.259	0.207	1	CD34+ Gran	TIMM23B	Up
0.00746575	0.0955997	0.305	0.253	1	CD34+ Gran	IRF5	Up
0.00747598	-0.110299	0.694	0.739	1	CD34+ Gran	STK26	Down
0.00752982	0.0750006	0.529	0.469	1	CD34+ Gran	SRSF8	Up
0.00755953	-0.0702579	1	1	1	CD34+ Gran	RPL7A	Down
0.00756752	-0.078711	0.997	0.998	1	CD34+ Gran	RPS17	Down
0.00757334	0.0651785	0.149	0.109	1	CD34+ Gran	CEMIP2	Up
0.00758233	-0.0610202	0.998	0.998	1	CD34+ Gran	RPS3A	Down
0.00760404	-0.0791847	0.845	0.875	1	CD34+ Gran	ERGIC3	Down
0.00765478	0.0811368	0.176	0.133	1	CD34+ Gran	JAM3	Up
0.00766746	0.0835204	0.24	0.191	1	CD34+ Gran	IL4R	Up
0.00772175	-0.0889537	0.933	0.95	1	CD34+ Gran	SRSF11	Down
0.00772273	0.0529317	0.104	0.069	1	CD34+ Gran	SPAG1	Up
0.00779218	-0.117	0.602	0.65	1	CD34+ Gran	SLC36A4	Down
0.0078732	-0.0915085	0.835	0.866	1	CD34+ Gran	MDM4	Down
0.00787671	-0.0876662	0.879	0.893	1	CD34+ Gran	AP2S1	Down
0.00787827	0.174942	0.585	0.559	1	CD34+ Gran	LAP3	Up
0.00802124	0.0820961	0.906	0.861	1	CD34+ Gran	LBR	Up
0.00805134	0.0426024	0.107	0.071	1	CD34+ Gran	AL158212.5	Up
0.00808359	0.0813388	0.38	0.32	1	CD34+ Gran	AKT3	Up
0.00810932	-0.123499	0.627	0.671	1	CD34+ Gran	UCP2	Down
0.00811066	0.100945	0.273	0.221	1	CD34+ Gran	USP13	Up
0.00811964	0.0487235	0.104	0.069	1	CD34+ Gran	NEURL1	Up
0.0081542	-0.0537253	0.095	0.135	1	CD34+ Gran	RCE1	Down
0.00820935	-0.0851669	0.911	0.941	1	CD34+ Gran	HIGD2A	Down
0.00824757	0.085758	0.206	0.16	1	CD34+ Gran	NINJ2	Up
0.00826437	0.0802207	0.179	0.135	1	CD34+ Gran	CREB5	Up
0.00829249	0.0715272	0.275	0.22	1	CD34+ Gran	RAB29	Up
0.00830797	0.0883774	0.352	0.297	1	CD34+ Gran	CBLB	Up
0.00833116	0.103471	0.673	0.625	1	CD34+ Gran	NR3C1	Up
0.00837577	-0.0971294	0.347	0.408	1	CD34+ Gran	CEP290	Down
0.00839228	0.0546976	0.101	0.067	1	CD34+ Gran	SLC2A6	Up
0.00840492	0.0918244	0.325	0.27	1	CD34+ Gran	L3MBTL3	Up
0.00846027	-0.126393	0.929	0.952	1	CD34+ Gran	SH3BGRL3	Down
0.00847376	0.0777536	0.183	0.139	1	CD34+ Gran	FAM118B	Up
0.00855563	0.0738179	0.337	0.28	1	CD34+ Gran	MOCS2	Up
0.0086566	0.0897757	0.259	0.209	1	CD34+ Gran	GLIDR	Up
0.00870996	0.0581931	0.165	0.122	1	CD34+ Gran	IL18R1	Up
0.00875226	-0.112505	0.898	0.905	1	CD34+ Gran	ACTR3	Down
0.00875411	0.046236	0.1	0.066	1	CD34+ Gran	ARMCX4	Up
0.00875908	0.0683687	0.442	0.377	1	CD34+ Gran	EPB41L3	Up
0.00878089	0.0595289	0.108	0.073	1	CD34+ Gran	LINC02728	Up
0.00883197	0.0887735	0.268	0.218	1	CD34+ Gran	TAGAP	Up
0.00887715	0.0818448	0.515	0.457	1	CD34+ Gran	NFIA	Up
0.00888852	0.046236	0.1	0.066	1	CD34+ Gran	C4orf19	Up
0.00891148	0.0767628	0.34	0.279	1	CD34+ Gran	PARP9	Up
0.00893851	0.0946999	0.535	0.48	1	CD34+ Gran	CCNC	Up
0.00895042	0.0951126	0.282	0.234	1	CD34+ Gran	AC097448.1	Up
0.00898194	-0.0442257	0.32	0.387	1	CD34+ Gran	GABPB2	Down
0.00901441	0.0413815	0.104	0.069	1	CD34+ Gran	PRKCE	Up
0.00902781	0.076151	0.169	0.127	1	CD34+ Gran	CLMN	Up
0.00904635	-0.0852488	0.986	0.979	1	CD34+ Gran	TMEM258	Down
0.00905912	-0.108096	0.592	0.643	1	CD34+ Gran	LAGE3	Down
0.00908668	-0.0972431	0.562	0.612	1	CD34+ Gran	ZNHIT3	Down
0.00908843	0.0954114	0.233	0.186	1	CD34+ Gran	LRRC8C-DT	Up
0.00914815	0.0722316	0.147	0.107	1	CD34+ Gran	GFI1B	Up
0.00919368	0.0619236	0.421	0.349	1	CD34+ Gran	MT2A	Up
0.00920547	-0.0730573	0.137	0.181	1	CD34+ Gran	RASGRP4	Down
0.00930847	-0.104387	0.984	0.992	1	CD34+ Gran	TXN	Down
0.00931759	0.0729652	0.708	0.644	1	CD34+ Gran	ATP2A2	Up
0.00943954	0.0513932	0.127	0.089	1	CD34+ Gran	APOL1	Up
0.00943981	-0.083241	0.609	0.66	1	CD34+ Gran	HDAC1	Down
0.00944616	0.045208	0.111	0.076	1	CD34+ Gran	TMEM25	Up
0.00945967	-0.0659298	0.346	0.416	1	CD34+ Gran	CCDC91	Down
0.00949917	-0.0664863	0.087	0.123	1	CD34+ Gran	HMGB1P24	Down
0.00951056	-0.0813584	0.098	0.137	1	CD34+ Gran	AC002454.1	Down
0.00953448	-0.0693452	0.135	0.179	1	CD34+ Gran	PROK2	Down
0.00955171	-0.0915717	0.485	0.552	1	CD34+ Gran	FAH	Down
0.00959725	-0.0589713	0.193	0.245	1	CD34+ Gran	FOXJ2	Down
0.00961245	0.0811473	0.41	0.354	1	CD34+ Gran	EREG	Up
0.00961782	0.0869167	0.889	0.851	1	CD34+ Gran	PYGL	Up
0.00962362	0.092533	0.398	0.343	1	CD34+ Gran	CCDC69	Up
0.00963801	-0.0943715	0.435	0.491	1	CD34+ Gran	UVRAG	Down
0.00965091	0.0983	0.335	0.284	1	CD34+ Gran	DACH1	Up
0.00966625	-0.0945422	0.175	0.221	1	CD34+ Gran	HIST2H2BE	Down
0.00966969	0.0651797	0.201	0.156	1	CD34+ Gran	GDI1	Up
0.00968192	-0.0885867	0.398	0.459	1	CD34+ Gran	FERMT3	Down
0.00968297	0.0915625	0.975	0.973	1	CD34+ Gran	YWHAZ	Up
0.00972885	-0.0469552	0.085	0.123	1	CD34+ Gran	RECQL4	Down
0.00974527	-0.071161	0.273	0.325	1	CD34+ Gran	MED12	Down
0.00980194	0.0739971	0.179	0.136	1	CD34+ Gran	NDN	Up
0.00986101	0.0763475	0.344	0.291	1	CD34+ Gran	LYSMD3	Up
0.00988108	0.0700134	0.153	0.113	1	CD34+ Gran	HLA-DOA	Up
0.00989598	0.0793085	0.491	0.424	1	CD34+ Gran	EDEM2	Up
0.0098971	0.0702333	0.115	0.08	1	CD34+ Gran	MLF1	Up
0.00993591	0.0758198	0.219	0.172	1	CD34+ Gran	ARAP2	Up
0.0100012	0.0654392	0.18	0.136	1	CD34+ Gran	PCSK5	Up
0.0100791	0.0846191	0.571	0.516	1	CD34+ Gran	SAMSN1	Up
0.0101413	-0.118855	0.97	0.968	1	CD34+ Gran	XBP1	Down
0.010189	-0.0876848	0.723	0.754	1	CD34+ Gran	CUX1	Down
0.0102045	0.0580297	0.145	0.105	1	CD34+ Gran	KAZN	Up
0.0102277	0.117953	0.45	0.389	1	CD34+ Gran	PAG1	Up
0.0102355	0.099206	0.238	0.193	1	CD34+ Gran	SORT1	Up
0.0102609	0.0809829	0.353	0.298	1	CD34+ Gran	SWI5	Up
0.010284	0.0922088	0.473	0.421	1	CD34+ Gran	SQOR	Up
0.0103169	-0.0673521	1	1	1	CD34+ Gran	MT-RNR2	Down
0.0103366	0.100393	0.66	0.602	1	CD34+ Gran	INTS6	Up
0.0103617	0.0638477	0.107	0.073	1	CD34+ Gran	GABBR1	Up
0.0103854	0.0811317	0.249	0.197	1	CD34+ Gran	SERPINB2	Up
0.0103949	-0.0475055	0.155	0.203	1	CD34+ Gran	RAB40C	Down
0.0104	-0.124547	0.858	0.856	1	CD34+ Gran	FADS2	Down
0.0104264	-0.0836293	0.22	0.269	1	CD34+ Gran	PREB	Down
0.0104851	-0.0635791	0.248	0.302	1	CD34+ Gran	DNAJC5	Down
0.0105016	0.113098	0.334	0.285	1	CD34+ Gran	SYT11	Up
0.0105062	-0.0789319	0.256	0.309	1	CD34+ Gran	TARSL2	Down
0.0105649	-0.0683792	0.47	0.526	1	CD34+ Gran	PPCS	Down
0.0106016	0.0538254	0.113	0.078	1	CD34+ Gran	HPSE	Up
0.010616	0.0867356	0.219	0.173	1	CD34+ Gran	LDLRAD4	Up
0.0106202	-0.0373317	0.196	0.251	1	CD34+ Gran	TUSC1	Down
0.0106869	0.108861	0.424	0.376	1	CD34+ Gran	HENMT1	Up
0.0107351	0.0497176	0.111	0.077	1	CD34+ Gran	LINC02193	Up
0.0107395	-0.104371	0.501	0.552	1	CD34+ Gran	STXBP2	Down
0.0107659	0.0617151	0.19	0.146	1	CD34+ Gran	MORC4	Up
0.0107849	-0.0907122	0.637	0.661	1	CD34+ Gran	NMT1	Down
0.0107995	-0.0643479	1	1	1	CD34+ Gran	RPL35	Down
0.0107997	0.0675845	0.28	0.228	1	CD34+ Gran	JOSD2	Up
0.0108136	-0.0948079	0.702	0.732	1	CD34+ Gran	SREK1IP1	Down
0.01087	-0.0582794	0.147	0.193	1	CD34+ Gran	SUGP1	Down
0.0108766	0.134304	0.574	0.546	1	CD34+ Gran	PHACTR1	Up
0.0109123	0.0763956	0.351	0.291	1	CD34+ Gran	C11orf49	Up
0.0109294	0.129392	0.344	0.295	1	CD34+ Gran	IRF8	Up
0.010975	0.11093	0.709	0.651	1	CD34+ Gran	EIF2AK2	Up
0.0109913	0.0724303	0.156	0.116	1	CD34+ Gran	NQO1	Up
0.0110646	-0.0920629	0.6	0.647	1	CD34+ Gran	AK3	Down
0.011099	-0.0799131	0.637	0.691	1	CD34+ Gran	SMC4	Down
0.0111279	0.0642062	0.18	0.136	1	CD34+ Gran	FAM110A	Up
0.0111666	0.0599662	0.144	0.105	1	CD34+ Gran	RAB20	Up
0.0112034	0.0518755	0.113	0.078	1	CD34+ Gran	AC132192.2	Up
0.0112463	0.0844288	0.365	0.312	1	CD34+ Gran	RAB3IP	Up
0.011337	0.0451476	0.129	0.091	1	CD34+ Gran	SYTL2	Up
0.0113643	-0.0731949	0.371	0.435	1	CD34+ Gran	SACM1L	Down
0.011419	-0.0690189	0.973	0.976	1	CD34+ Gran	EIF3H	Down
0.0114738	0.104344	0.452	0.397	1	CD34+ Gran	PELP1	Up
0.0115178	-0.125265	0.57	0.623	1	CD34+ Gran	CKS1B	Down
0.011614	-0.0540313	0.09	0.126	1	CD34+ Gran	WHAMMP3	Down
0.011621	-0.0734654	0.504	0.557	1	CD34+ Gran	MRPS18B	Down
0.0116214	-0.0668847	0.113	0.151	1	CD34+ Gran	ERVK13-1	Down
0.0116461	0.0858005	0.264	0.216	1	CD34+ Gran	RAPGEF2	Up
0.0117215	0.0509174	0.132	0.094	1	CD34+ Gran	ANKRD22	Up
0.0117257	0.054935	0.17	0.127	1	CD34+ Gran	AZIN1-AS1	Up
0.0117419	-0.122333	0.768	0.788	1	CD34+ Gran	SIVA1	Down
0.0117443	-0.0435878	0.159	0.207	1	CD34+ Gran	SMCR8	Down
0.011761	0.0787943	0.521	0.458	1	CD34+ Gran	LRRFIP2	Up
0.0118149	0.0542044	0.129	0.092	1	CD34+ Gran	E2F5	Up
0.0118409	-0.0685494	0.207	0.257	1	CD34+ Gran	PNPLA3	Down
0.0118494	-0.0739129	0.26	0.314	1	CD34+ Gran	RIT1	Down
0.0119055	-0.0941986	0.813	0.842	1	CD34+ Gran	LMAN2	Down
0.0119085	0.118644	0.768	0.758	1	CD34+ Gran	AAK1	Up
0.0120461	0.0715078	0.596	0.541	1	CD34+ Gran	TOP1MT	Up
0.0121093	0.0686038	0.234	0.185	1	CD34+ Gran	USP40	Up
0.0121104	-0.0954099	0.381	0.43	1	CD34+ Gran	CLCN6	Down
0.0121823	-0.0998737	0.517	0.56	1	CD34+ Gran	CD302	Down
0.0121991	0.0592203	0.11	0.077	1	CD34+ Gran	SGIP1	Up
0.0122018	0.0389143	0.1	0.067	1	CD34+ Gran	CHKB-DT	Up
0.0122129	-0.134209	0.953	0.961	1	CD34+ Gran	HIST1H4C	Down
0.0122303	0.059665	0.147	0.109	1	CD34+ Gran	NPM2	Up
0.0123203	-0.0710487	0.18	0.226	1	CD34+ Gran	WDR92	Down
0.0123341	-0.0964313	0.978	0.986	1	CD34+ Gran	RPL9	Down
0.0123414	0.0461562	0.184	0.139	1	CD34+ Gran	PI4K2B	Up
0.0123438	0.0525553	0.128	0.091	1	CD34+ Gran	SIGLEC15	Up
0.0124191	0.09807	0.523	0.464	1	CD34+ Gran	SHKBP1	Up
0.0124195	-0.0591426	0.282	0.343	1	CD34+ Gran	WDR76	Down
0.0124569	-0.0630787	0.267	0.321	1	CD34+ Gran	MAP3K4	Down
0.0124703	0.048589	0.103	0.07	1	CD34+ Gran	SYTL4	Up
0.0125106	0.0524323	0.176	0.133	1	CD34+ Gran	TNFRSF10A	Up
0.0125806	0.0816946	0.158	0.12	1	CD34+ Gran	CCDC136	Up
0.012594	-0.114717	0.946	0.955	1	CD34+ Gran	SRRM1	Down
0.0126083	0.0920614	0.653	0.602	1	CD34+ Gran	TCEAL3	Up
0.0126201	0.0554821	0.186	0.143	1	CD34+ Gran	AL591501.1	Up
0.0126357	-0.0816578	0.386	0.44	1	CD34+ Gran	LCORL	Down
0.012685	-0.0989305	0.472	0.515	1	CD34+ Gran	BAG4	Down
0.0127799	-0.0970467	0.697	0.736	1	CD34+ Gran	TFDP1	Down
0.0127836	0.0669771	0.174	0.134	1	CD34+ Gran	SCN1B	Up
0.0128137	0.0575868	0.829	0.787	1	CD34+ Gran	LMO4	Up
0.0128262	-0.0896321	0.682	0.728	1	CD34+ Gran	NCBP3	Down
0.0129112	-0.0541345	0.365	0.425	1	CD34+ Gran	CAMKK2	Down
0.0129704	-0.0720988	0.915	0.928	1	CD34+ Gran	APEX1	Down
0.012976	-0.101698	0.606	0.656	1	CD34+ Gran	PIAS1	Down
0.0130037	-0.109546	0.558	0.607	1	CD34+ Gran	UBE2E1	Down
0.0130378	0.0924122	0.504	0.447	1	CD34+ Gran	CRYGD	Up
0.0130946	-0.0837801	0.473	0.527	1	CD34+ Gran	UHRF2	Down
0.0131769	0.0476625	0.123	0.088	1	CD34+ Gran	AL592183.1	Up
0.0132696	0.0443768	0.103	0.07	1	CD34+ Gran	KLHL3	Up
0.013332	-0.0783355	0.369	0.424	1	CD34+ Gran	HIST1H1B	Down
0.0133683	0.128809	0.603	0.565	1	CD34+ Gran	RPS6KA3	Up
0.0133746	0.0452713	0.104	0.071	1	CD34+ Gran	RNF165	Up
0.0134196	-0.0794458	0.968	0.971	1	CD34+ Gran	MT-TQ	Down
0.0134383	-0.101321	0.478	0.524	1	CD34+ Gran	NUP214	Down
0.013529	0.0795447	0.232	0.188	1	CD34+ Gran	GABARAP	Up
0.0135756	0.0602986	0.235	0.188	1	CD34+ Gran	MTRF1	Up
0.0136137	-0.0879834	0.497	0.558	1	CD34+ Gran	SNRNP25	Down
0.0136202	-0.0782044	0.368	0.423	1	CD34+ Gran	DCTD	Down
0.0136307	-0.137082	0.851	0.855	1	CD34+ Gran	LRPAP1	Down
0.013657	0.0902402	0.356	0.306	1	CD34+ Gran	ZNF124	Up
0.0137344	-0.064911	0.492	0.557	1	CD34+ Gran	TENT2	Down
0.0137752	-0.0555949	0.211	0.262	1	CD34+ Gran	RFC5	Down
0.013792	0.0511205	0.133	0.096	1	CD34+ Gran	DLGAP1-AS1	Up
0.0138031	0.0768773	0.28	0.232	1	CD34+ Gran	RAB44	Up
0.0138835	-0.0740771	0.225	0.274	1	CD34+ Gran	FAM92A	Down
0.0138934	-0.126319	0.759	0.785	1	CD34+ Gran	LAPTM5	Down
0.0139912	-0.0564733	0.128	0.169	1	CD34+ Gran	MIPEP	Down
0.014036	-0.083138	0.889	0.904	1	CD34+ Gran	TBL1XR1	Down
0.014085	0.0900558	0.391	0.343	1	CD34+ Gran	CDKN2AIPNL	Up
0.0141484	0.0903163	0.667	0.613	1	CD34+ Gran	KAT6A	Up
0.0141657	-0.0922401	0.445	0.498	1	CD34+ Gran	TMEM60	Down
0.014201	0.0782171	0.251	0.206	1	CD34+ Gran	FAM171B	Up
0.0142385	-0.094571	0.871	0.889	1	CD34+ Gran	SPCS2	Down
0.0144636	-0.0977426	0.446	0.497	1	CD34+ Gran	CDT1	Down
0.0145216	0.101214	0.379	0.333	1	CD34+ Gran	PLGRKT	Up
0.0145348	-0.085628	0.697	0.735	1	CD34+ Gran	DRAP1	Down
0.0145624	0.0790714	0.25	0.204	1	CD34+ Gran	BMP2K	Up
0.0145795	0.0575207	0.154	0.115	1	CD34+ Gran	SMPDL3B	Up
0.0146173	0.0731972	0.301	0.248	1	CD34+ Gran	ST6GAL1	Up
0.0146458	-0.077098	0.492	0.548	1	CD34+ Gran	UBAC1	Down
0.0146618	0.0455258	0.106	0.073	1	CD34+ Gran	MRPL20-AS1	Up
0.0146759	0.0750588	0.22	0.175	1	CD34+ Gran	FZD3	Up
0.0146941	0.0828945	0.359	0.308	1	CD34+ Gran	MIPOL1	Up
0.0147426	-0.0566139	0.129	0.169	1	CD34+ Gran	RAD9A	Down
0.0147619	-0.0709088	0.584	0.638	1	CD34+ Gran	COMMD4	Down
0.0148636	-0.0654392	0.259	0.311	1	CD34+ Gran	ZNF675	Down
0.0148682	0.0677663	0.228	0.182	1	CD34+ Gran	BCL3	Up
0.0149205	0.0613113	0.142	0.105	1	CD34+ Gran	TMEM44	Up
0.0149565	-0.10087	0.543	0.581	1	CD34+ Gran	NPDC1	Down
0.014968	0.0595901	0.148	0.111	1	CD34+ Gran	STPG1	Up
0.0149713	0.0819547	0.716	0.671	1	CD34+ Gran	LAPTM4A	Up
0.0149768	0.0456537	0.106	0.073	1	CD34+ Gran	AC072028.1	Up
0.0150621	0.0692636	0.35	0.295	1	CD34+ Gran	TRIM6	Up
0.015101	-0.126944	0.539	0.577	1	CD34+ Gran	NEU1	Down
0.0151135	-0.134926	0.675	0.701	1	CD34+ Gran	FASN	Down
0.0151275	-0.0778074	0.093	0.128	1	CD34+ Gran	U47924.2	Down
0.0151419	-0.0566611	0.094	0.129	1	CD34+ Gran	AL132989.1	Down
0.0151451	-0.0895313	0.931	0.946	1	CD34+ Gran	RBM3	Down
0.0151676	-0.0509668	0.101	0.137	1	CD34+ Gran	ZNF778	Down
0.0152908	-0.0830417	0.738	0.777	1	CD34+ Gran	DOCK2	Down
0.015338	-0.0862704	0.608	0.654	1	CD34+ Gran	NAA10	Down
0.015345	0.0743275	0.271	0.221	1	CD34+ Gran	HMBS	Up
0.0153561	0.0491785	0.113	0.079	1	CD34+ Gran	ENPP2	Up
0.0153659	0.060853	0.147	0.11	1	CD34+ Gran	DGKG	Up
0.0153682	-0.131447	0.286	0.328	1	CD34+ Gran	AC000065.1	Down
0.0154009	0.0970054	0.985	0.981	1	CD34+ Gran	ANXA1	Up
0.0154009	0.0744914	0.242	0.196	1	CD34+ Gran	TP53I11	Up
0.0154689	0.0556879	0.289	0.237	1	CD34+ Gran	FAM3C	Up
0.0155426	0.0660683	0.198	0.157	1	CD34+ Gran	APOO	Up
0.0155892	-0.0921172	0.425	0.479	1	CD34+ Gran	YDJC	Down
0.0155972	0.0672173	0.169	0.129	1	CD34+ Gran	CC2D2A	Up
0.0157122	0.0951715	0.326	0.282	1	CD34+ Gran	HTATIP2	Up
0.0157189	-0.102124	0.924	0.928	1	CD34+ Gran	NDUFA13	Down
0.0157897	0.111978	0.502	0.458	1	CD34+ Gran	ANTXR2	Up
0.0158142	-0.109236	0.815	0.842	1	CD34+ Gran	LRPPRC	Down
0.0158475	-0.0552032	1	1	1	CD34+ Gran	RPL23A	Down
0.0159302	-0.132206	0.984	0.989	1	CD34+ Gran	TUBA1A	Down
0.0159593	0.0763556	0.192	0.15	1	CD34+ Gran	CDKN1C	Up
0.0159852	0.0643483	0.445	0.38	1	CD34+ Gran	RPP25L	Up
0.0161008	-0.0672942	0.305	0.357	1	CD34+ Gran	ITPRIPL2	Down
0.0161098	0.0525761	0.111	0.079	1	CD34+ Gran	AC135050.1	Up
0.0161279	-0.0853956	0.797	0.818	1	CD34+ Gran	PRXL2A	Down
0.0161655	-0.0799514	0.78	0.811	1	CD34+ Gran	POLR2J3.1	Down
0.0161925	0.0828364	0.327	0.279	1	CD34+ Gran	GABARAPL1	Up
0.0162164	0.0603248	0.156	0.118	1	CD34+ Gran	UXT-AS1	Up
0.0162219	0.107058	0.522	0.474	1	CD34+ Gran	COMMD2	Up
0.0162312	0.0643845	0.245	0.196	1	CD34+ Gran	ZBTB33	Up
0.0162316	-0.076613	0.402	0.453	1	CD34+ Gran	UBR4	Down
0.0162879	0.102298	0.444	0.401	1	CD34+ Gran	ERV3-1	Up
0.0162881	0.0587168	0.196	0.154	1	CD34+ Gran	RTN2	Up
0.0163048	0.106462	0.813	0.779	1	CD34+ Gran	YWHAG	Up
0.0163085	0.083645	0.884	0.822	1	CD34+ Gran	SOX4	Up
0.0163222	0.0770868	0.837	0.792	1	CD34+ Gran	LTA4H	Up
0.016326	-0.071013	0.828	0.861	1	CD34+ Gran	TOP2B	Down
0.0163467	-0.0772548	0.97	0.968	1	CD34+ Gran	RSL24D1	Down
0.0164163	-0.0967828	0.59	0.632	1	CD34+ Gran	WDR61	Down
0.0164381	-0.0826182	0.547	0.611	1	CD34+ Gran	C20orf27	Down
0.0165003	0.119923	0.575	0.525	1	CD34+ Gran	N4BP2	Up
0.0165233	-0.127205	0.855	0.876	1	CD34+ Gran	VDAC1	Down
0.0165236	-0.0684086	0.252	0.302	1	CD34+ Gran	CBFA2T2	Down
0.0166467	-0.0738045	0.583	0.633	1	CD34+ Gran	FARSA	Down
0.0167554	-0.0934783	0.59	0.627	1	CD34+ Gran	SEC61A1	Down
0.0167873	0.0820027	0.432	0.373	1	CD34+ Gran	TSC22D3	Up
0.0169742	-0.132539	0.55	0.573	1	CD34+ Gran	ALYREF	Down
0.0170025	-0.0856114	0.662	0.716	1	CD34+ Gran	ARID3A	Down
0.0171003	0.0564291	0.129	0.094	1	CD34+ Gran	AC024145.1	Up
0.0171094	-0.0917329	0.365	0.414	1	CD34+ Gran	SCLT1	Down
0.0172028	0.058686	0.123	0.09	1	CD34+ Gran	BCAM	Up
0.0172333	0.0810213	0.24	0.197	1	CD34+ Gran	SLC30A6	Up
0.0172494	0.0754684	0.443	0.391	1	CD34+ Gran	RBCK1	Up
0.0172554	-0.0959452	0.858	0.885	1	CD34+ Gran	PCLAF	Down
0.0173073	-0.108759	0.793	0.803	1	CD34+ Gran	LSM4	Down
0.0173257	-0.0940221	0.56	0.627	1	CD34+ Gran	MCM6	Down
0.01735	0.0445083	0.186	0.143	1	CD34+ Gran	AC011481.3	Up
0.0173561	0.111922	0.538	0.5	1	CD34+ Gran	ZNF217	Up
0.0174794	0.0855616	0.288	0.241	1	CD34+ Gran	SLC16A10	Up
0.0175033	0.0608064	0.131	0.096	1	CD34+ Gran	CA11	Up
0.0175287	-0.0741106	0.714	0.761	1	CD34+ Gran	CEP57	Down
0.0175488	0.0986599	0.756	0.705	1	CD34+ Gran	TNFAIP8	Up
0.0176004	-0.0805403	0.985	0.97	1	CD34+ Gran	NDUFS5	Down
0.0176134	0.0774646	0.35	0.3	1	CD34+ Gran	SPRYD7	Up
0.0176247	0.0557568	0.182	0.14	1	CD34+ Gran	ZNF589	Up
0.0176621	0.0561391	0.128	0.093	1	CD34+ Gran	AC098818.2	Up
0.0176662	0.0595289	0.108	0.077	1	CD34+ Gran	ARHGEF3	Up
0.0177176	-0.0617196	0.995	0.997	1	CD34+ Gran	SLC25A3	Down
0.0177276	0.0456223	0.184	0.141	1	CD34+ Gran	CRISPLD1	Up
0.017762	-0.106791	0.59	0.64	1	CD34+ Gran	HAT1	Down
0.0178646	0.0664585	0.372	0.316	1	CD34+ Gran	CEP135	Up
0.0179148	-0.0394988	0.106	0.144	1	CD34+ Gran	AC137932.1	Down
0.0180102	0.0733283	0.202	0.162	1	CD34+ Gran	ADCY3	Up
0.0180159	-0.0661647	0.248	0.298	1	CD34+ Gran	JPT2	Down
0.0180282	-0.0540155	0.126	0.164	1	CD34+ Gran	FANCC	Down
0.0180305	-0.0697179	0.307	0.359	1	CD34+ Gran	RFXANK	Down
0.0180671	0.0620421	0.426	0.371	1	CD34+ Gran	GLMN	Up
0.0181642	0.0674629	0.33	0.276	1	CD34+ Gran	ISYNA1	Up
0.0181657	-0.0502232	0.076	0.107	1	CD34+ Gran	OPN3	Down
0.0183012	0.0812525	0.741	0.698	1	CD34+ Gran	DYNC1I2	Up
0.0183017	-0.192533	0.386	0.432	1	CD34+ Gran	HIST1H3B	Down
0.0183029	0.0834173	0.265	0.22	1	CD34+ Gran	DNASE2	Up
0.0183742	0.0642632	0.321	0.27	1	CD34+ Gran	RALB	Up
0.0184577	-0.0542885	0.147	0.189	1	CD34+ Gran	SIK2	Down
0.0184918	-0.138802	0.771	0.788	1	CD34+ Gran	B4GALT5	Down
0.0185128	0.0493125	0.114	0.081	1	CD34+ Gran	FDX2	Up
0.0185435	0.0760954	0.485	0.434	1	CD34+ Gran	STAMBP	Up
0.0185498	0.0615908	0.235	0.19	1	CD34+ Gran	AP001033.1	Up
0.0186161	0.0568986	0.412	0.356	1	CD34+ Gran	ATG4C	Up
0.0186237	0.0721808	0.199	0.158	1	CD34+ Gran	CCDC152	Up
0.0186713	0.0446298	0.1	0.069	1	CD34+ Gran	DMWD	Up
0.0186875	-0.108641	0.739	0.765	1	CD34+ Gran	DHCR7	Down
0.0187065	0.0508362	0.106	0.075	1	CD34+ Gran	GNG2	Up
0.0187313	-0.157728	0.652	0.662	1	CD34+ Gran	MCM7	Down
0.0187384	-0.0861208	0.694	0.73	1	CD34+ Gran	ERLIN1	Down
0.0188906	-0.0471204	0.083	0.116	1	CD34+ Gran	AC022007.1	Down
0.0188975	0.0423048	0.141	0.104	1	CD34+ Gran	FBXL19	Up
0.0189	0.0811079	0.242	0.201	1	CD34+ Gran	CCDC127	Up
0.0189509	-0.0524272	0.129	0.168	1	CD34+ Gran	HYI	Down
0.018958	0.072409	0.313	0.261	1	CD34+ Gran	AARS	Up
0.0191356	0.0653107	0.157	0.121	1	CD34+ Gran	MAPK13	Up
0.0191435	-0.0760383	0.448	0.502	1	CD34+ Gran	SLMAP	Down
0.0191642	-0.132145	0.893	0.884	1	CD34+ Gran	CITED2	Down
0.0192034	-0.0991782	0.611	0.655	1	CD34+ Gran	MRPS12	Down
0.0192048	-0.0794308	0.324	0.373	1	CD34+ Gran	IRF2BPL	Down
0.0192935	0.0511122	0.103	0.072	1	CD34+ Gran	AC007114.1	Up
0.0193094	-0.0457204	0.084	0.117	1	CD34+ Gran	FSD1L	Down
0.0194708	0.106741	0.569	0.534	1	CD34+ Gran	DDHD1	Up
0.0195479	0.0610963	0.207	0.164	1	CD34+ Gran	SS18L1	Up
0.019724	-0.0859732	0.169	0.207	1	CD34+ Gran	E2F1	Down
0.0197446	0.0524674	0.145	0.109	1	CD34+ Gran	BTN2A2	Up
0.0197874	0.0472087	0.122	0.089	1	CD34+ Gran	METTL18	Up
0.0198191	0.0469788	0.15	0.113	1	CD34+ Gran	AC068389.3	Up
0.0198475	0.0717509	0.551	0.492	1	CD34+ Gran	SLC16A1-AS1	Up
0.0198694	0.0425415	0.148	0.111	1	CD34+ Gran	ANKRD13B	Up
0.0199311	0.085737	0.446	0.389	1	CD34+ Gran	LRBA	Up
0.0199825	0.0843202	0.275	0.23	1	CD34+ Gran	SOCS5	Up
0.0200206	0.0757104	0.418	0.367	1	CD34+ Gran	IFNGR2	Up
0.0201312	-0.0567714	0.092	0.125	1	CD34+ Gran	ACADS	Down
0.0201471	-0.0959586	0.789	0.817	1	CD34+ Gran	USP48	Down
0.0202394	0.0942382	0.56	0.516	1	CD34+ Gran	ORAI1	Up
0.0203685	-0.129743	0.536	0.577	1	CD34+ Gran	ACAT2	Down
0.0204575	-0.0903689	0.558	0.61	1	CD34+ Gran	VRK1	Down
0.0204575	0.0860009	0.268	0.226	1	CD34+ Gran	RINL	Up
0.0205023	-0.092108	0.922	0.93	1	CD34+ Gran	GSTO1	Down
0.0205104	-0.0569942	0.264	0.316	1	CD34+ Gran	TRAF7	Down
0.0206053	0.109445	0.449	0.407	1	CD34+ Gran	AC015912.3	Up
0.0206235	0.0444398	0.103	0.072	1	CD34+ Gran	SGSM3	Up
0.0206498	0.0856773	0.379	0.33	1	CD34+ Gran	ARRDC3	Up
0.0207007	0.0724047	0.355	0.304	1	CD34+ Gran	CTDP1	Up
0.0207077	0.085164	0.68	0.638	1	CD34+ Gran	MFF	Up
0.0207142	-0.0574041	0.136	0.175	1	CD34+ Gran	ARHGEF11	Down
0.0207251	0.0926802	0.276	0.234	1	CD34+ Gran	CCDC71L	Up
0.0207383	0.0597007	0.203	0.162	1	CD34+ Gran	TMEM120B	Up
0.0207904	0.0954569	0.935	0.912	1	CD34+ Gran	CD48	Up
0.0208265	0.0728524	0.218	0.177	1	CD34+ Gran	MREG	Up
0.0208376	0.0621775	0.237	0.193	1	CD34+ Gran	CALCOCO1	Up
0.0208748	-0.09025	0.97	0.988	1	CD34+ Gran	TSPO	Down
0.0209177	-0.0471204	0.089	0.122	1	CD34+ Gran	AC016590.3	Down
0.0209202	0.0628841	0.222	0.177	1	CD34+ Gran	COMTD1	Up
0.0209753	0.0870553	0.807	0.775	1	CD34+ Gran	URI1	Up
0.0210653	0.0951309	0.708	0.66	1	CD34+ Gran	MAP3K20	Up
0.0211413	0.0795312	0.711	0.666	1	CD34+ Gran	NABP1	Up
0.0211695	0.0652974	0.282	0.234	1	CD34+ Gran	UBA6-AS1	Up
0.0212165	-0.104534	0.348	0.398	1	CD34+ Gran	UNG	Down
0.0212168	0.066357	0.253	0.208	1	CD34+ Gran	BANP	Up
0.021275	0.0710831	0.144	0.11	1	CD34+ Gran	S1PR2	Up
0.0212782	0.0814094	0.284	0.24	1	CD34+ Gran	MAST4	Up
0.0212887	-0.0808714	0.895	0.906	1	CD34+ Gran	LAMP2	Down
0.0213063	0.125926	0.896	0.884	1	CD34+ Gran	ETV6	Up
0.0213966	0.0649339	0.282	0.234	1	CD34+ Gran	ARID5B	Up
0.0216045	-0.0662046	0.218	0.264	1	CD34+ Gran	FAM210B	Down
0.0216326	0.102128	0.57	0.533	1	CD34+ Gran	RHOBTB3	Up
0.0216992	-0.0975927	0.574	0.604	1	CD34+ Gran	CHID1	Down
0.0217127	0.0738329	0.371	0.327	1	CD34+ Gran	ANKRD13A	Up
0.021721	0.0575593	0.198	0.157	1	CD34+ Gran	ABCA13	Up
0.0217356	-0.0519625	0.108	0.144	1	CD34+ Gran	ULK3	Down
0.0217416	0.0594515	0.101	0.071	1	CD34+ Gran	HS3ST1	Up
0.0217583	0.0693682	0.228	0.186	1	CD34+ Gran	CERS4	Up
0.0218045	0.084628	0.281	0.235	1	CD34+ Gran	RBP4	Up
0.0219029	0.074318	0.366	0.317	1	CD34+ Gran	GPM6B	Up
0.0219175	-0.0680844	0.13	0.167	1	CD34+ Gran	HIST1H2BL	Down
0.0219256	-0.0418736	0.075	0.105	1	CD34+ Gran	ATXN7	Down
0.0219367	0.0568451	0.172	0.134	1	CD34+ Gran	ZDHHC14	Up
0.0219396	-0.0826029	0.801	0.818	1	CD34+ Gran	MSMO1	Down
0.0219587	-0.0722324	0.448	0.505	1	CD34+ Gran	KMT5A	Down
0.0219909	-0.0488594	0.118	0.155	1	CD34+ Gran	LSM14B	Down
0.0220033	0.0836306	0.32	0.277	1	CD34+ Gran	AL713998.1	Up
0.0220385	0.0596388	0.185	0.146	1	CD34+ Gran	CLHC1	Up
0.0220593	0.0411231	0.176	0.136	1	CD34+ Gran	ARHGAP12	Up
0.0220828	0.0860101	0.698	0.655	1	CD34+ Gran	UGP2	Up
0.0221026	0.109383	0.593	0.558	1	CD34+ Gran	SNHG15	Up
0.0221246	-0.0886163	0.995	0.993	1	CD34+ Gran	VAMP8	Down
0.0221443	-0.0893807	0.623	0.655	1	CD34+ Gran	MRPL18	Down
0.0222279	0.109973	0.977	0.964	1	CD34+ Gran	GMFG	Up
0.0223395	-0.0522408	0.137	0.177	1	CD34+ Gran	TBCC	Down
0.0224439	0.124665	0.571	0.539	1	CD34+ Gran	PHGDH	Up
0.0224468	0.0745825	0.519	0.476	1	CD34+ Gran	NAA25	Up
0.022507	-0.0625689	0.999	1	1	CD34+ Gran	BTF3	Down
0.0225181	0.0881847	0.885	0.844	1	CD34+ Gran	STK17B	Up
0.0226607	-0.0678378	0.581	0.621	1	CD34+ Gran	SLC38A1	Down
0.022696	0.0786068	0.367	0.32	1	CD34+ Gran	CRNKL1	Up
0.0228189	-0.0664621	0.256	0.304	1	CD34+ Gran	ZNF704	Down
0.0229415	0.0550249	0.33	0.276	1	CD34+ Gran	ABCC5	Up
0.0229914	0.108486	0.587	0.553	1	CD34+ Gran	AP5B1	Up
0.0230038	-0.0815478	0.596	0.65	1	CD34+ Gran	PDCD7	Down
0.0230105	0.0503385	0.16	0.123	1	CD34+ Gran	JAZF1	Up
0.023011	-0.112806	0.635	0.675	1	CD34+ Gran	SNRPA1	Down
0.0230198	0.0647989	0.25	0.205	1	CD34+ Gran	MTMR12	Up
0.0230303	0.0501826	0.145	0.11	1	CD34+ Gran	LIX1L-AS1	Up
0.0230854	-0.0783544	0.744	0.786	1	CD34+ Gran	ZNF292	Down
0.0230898	0.0532554	0.114	0.082	1	CD34+ Gran	CLNK	Up
0.0231782	0.0679074	0.218	0.177	1	CD34+ Gran	CCDC141	Up
0.0231971	0.0898831	0.819	0.776	1	CD34+ Gran	STT3B	Up
0.023263	0.0710576	0.324	0.275	1	CD34+ Gran	MAPK8	Up
0.0232764	0.0909587	0.813	0.755	1	CD34+ Gran	UBE2D2	Up
0.023284	0.0638774	0.271	0.223	1	CD34+ Gran	RIMKLB	Up
0.0232883	0.0868289	0.202	0.163	1	CD34+ Gran	TNFAIP3	Up
0.0234178	-0.0447506	0.07	0.1	1	CD34+ Gran	AL133245.1	Down
0.0234218	-0.0865189	0.449	0.492	1	CD34+ Gran	PHYKPL	Down
0.0234271	-0.11125	0.94	0.928	1	CD34+ Gran	CSTB	Down
0.0234848	0.0613504	0.118	0.087	1	CD34+ Gran	AASS	Up
0.0236243	0.0510878	0.207	0.164	1	CD34+ Gran	CASTOR2	Up
0.0237599	0.0567518	0.102	0.072	1	CD34+ Gran	AC005336.3	Up
0.0237763	0.0472087	0.121	0.089	1	CD34+ Gran	VLDLR	Up
0.0238981	-0.0678072	0.279	0.327	1	CD34+ Gran	SLC25A26	Down
0.023904	0.0586776	0.254	0.209	1	CD34+ Gran	DNAL1	Up
0.0239124	0.0974248	0.461	0.413	1	CD34+ Gran	CENPV	Up
0.023987	-0.0517112	0.114	0.149	1	CD34+ Gran	TAOK2	Down
0.0240346	-0.0370946	0.095	0.129	1	CD34+ Gran	ZFYVE1	Down
0.0240432	0.0742504	0.249	0.207	1	CD34+ Gran	HIST3H2A	Up
0.0240627	-0.0466575	0.102	0.136	1	CD34+ Gran	ACAP3	Down
0.0240631	0.0513904	0.103	0.073	1	CD34+ Gran	LIPE	Up
0.0240649	0.0807605	0.256	0.216	1	CD34+ Gran	SCAMP1-AS1	Up
0.0241279	-0.064273	0.202	0.246	1	CD34+ Gran	CWF19L1	Down
0.0241488	0.103156	0.506	0.469	1	CD34+ Gran	TOB1	Up
0.0243134	0.0686808	0.215	0.174	1	CD34+ Gran	FBXO21	Up
0.0244559	-0.0899569	0.99	0.985	1	CD34+ Gran	SLC25A6	Down
0.0244576	0.0871226	0.389	0.339	1	CD34+ Gran	CHST13	Up
0.0245918	-0.0432432	0.122	0.16	1	CD34+ Gran	TAX1BP3	Down
0.0246038	-0.111685	0.747	0.769	1	CD34+ Gran	POLR2F	Down
0.0246324	-0.0952057	0.87	0.877	1	CD34+ Gran	LDLR	Down
0.0246647	-0.0964799	0.241	0.284	1	CD34+ Gran	PLAU	Down
0.0247284	-0.0782376	0.246	0.289	1	CD34+ Gran	MAP2K3	Down
0.0248198	-0.0418845	0.219	0.265	1	CD34+ Gran	NAGA	Down
0.0248497	-0.125181	0.147	0.184	1	CD34+ Gran	AREG	Down
0.0249845	-0.0560021	0.258	0.308	1	CD34+ Gran	PHKG2	Down
0.0250779	0.05168	0.42	0.364	1	CD34+ Gran	CLSTN1	Up
0.0251173	-0.04844	0.132	0.17	1	CD34+ Gran	ZNF248	Down
0.0251719	0.0499798	0.187	0.148	1	CD34+ Gran	CNEP1R1	Up
0.0253866	0.0826167	0.847	0.833	1	CD34+ Gran	ARF6	Up
0.025529	-0.0401123	1	1	1	CD34+ Gran	RPS12	Down
0.0255527	0.0558514	0.126	0.093	1	CD34+ Gran	LINC02573	Up
0.0255543	0.0940262	0.885	0.857	1	CD34+ Gran	IQGAP1	Up
0.0255879	0.0485059	0.165	0.127	1	CD34+ Gran	U91328.1	Up
0.0256001	0.0714929	0.556	0.505	1	CD34+ Gran	LPP	Up
0.0256493	-0.0436325	0.139	0.178	1	CD34+ Gran	ADAP1	Down
0.0256588	0.0808215	0.409	0.365	1	CD34+ Gran	NEK7	Up
0.0256603	0.0495048	0.255	0.207	1	CD34+ Gran	AEBP1	Up
0.0256758	0.0704517	0.386	0.333	1	CD34+ Gran	VEGFB	Up
0.0256936	-0.061099	0.212	0.258	1	CD34+ Gran	RCAN3	Down
0.0257878	0.0466343	0.132	0.099	1	CD34+ Gran	IDNK	Up
0.0258112	-0.0494548	0.338	0.394	1	CD34+ Gran	ODR4	Down
0.0258543	-0.0633533	0.31	0.36	1	CD34+ Gran	TIMM8A	Down
0.0258785	0.0947827	0.425	0.375	1	CD34+ Gran	CLEC7A	Up
0.025938	-0.069659	0.2	0.241	1	CD34+ Gran	AC137932.3	Down
0.0259398	-0.061868	0.374	0.422	1	CD34+ Gran	MED10	Down
0.0259899	0.0450243	0.13	0.096	1	CD34+ Gran	AC027097.1	Up
0.025993	0.0752491	0.197	0.159	1	CD34+ Gran	AC048341.1	Up
0.0261652	-0.0708537	0.237	0.283	1	CD34+ Gran	AC067930.8	Down
0.0262197	0.0643729	0.264	0.219	1	CD34+ Gran	SYNGAP1	Up
0.0262296	-0.0418688	1	1	1	CD34+ Gran	RPS9	Down
0.026311	-0.0802596	0.616	0.677	1	CD34+ Gran	SOX11	Down
0.0263727	0.0725527	0.226	0.186	1	CD34+ Gran	NEGR1	Up
0.0263864	0.0715127	0.694	0.643	1	CD34+ Gran	ZFAND6	Up
0.0265102	-0.0860068	0.609	0.66	1	CD34+ Gran	TET2	Down
0.0265168	-0.0926531	0.657	0.695	1	CD34+ Gran	TECR	Down
0.026655	0.127469	0.461	0.424	1	CD34+ Gran	RNF125	Up
0.0266558	-0.106295	0.974	0.975	1	CD34+ Gran	TRA2B	Down
0.0266589	0.0897585	0.526	0.48	1	CD34+ Gran	TIMM17B	Up
0.0267259	-0.207699	0.997	0.991	1	CD34+ Gran	CALR	Down
0.0268364	0.0508286	0.351	0.299	1	CD34+ Gran	MVB12A	Up
0.0268827	0.100168	0.168	0.133	1	CD34+ Gran	IKZF2	Up
0.0269041	-0.114339	0.68	0.713	1	CD34+ Gran	CHCHD7	Down
0.026905	0.0794345	0.687	0.629	1	CD34+ Gran	NFE2	Up
0.0269174	-0.0989162	0.665	0.69	1	CD34+ Gran	PHKB	Down
0.0269472	-0.0888107	0.712	0.741	1	CD34+ Gran	ARF3	Down
0.0269598	0.0511436	0.183	0.144	1	CD34+ Gran	CASP7	Up
0.0270044	0.0485164	0.129	0.096	1	CD34+ Gran	ASPA	Up
0.0271233	-0.0872191	0.924	0.931	1	CD34+ Gran	ATP5PB	Down
0.0271246	0.077817	0.446	0.398	1	CD34+ Gran	SSH1	Up
0.0271995	0.0433235	0.118	0.087	1	CD34+ Gran	AC008966.1	Up
0.0272097	-0.092736	0.554	0.589	1	CD34+ Gran	CHSY1	Down
0.0272586	-0.0400755	0.242	0.293	1	CD34+ Gran	MTX1	Down
0.0272781	-0.0921193	0.3	0.342	1	CD34+ Gran	MXI1	Down
0.0272927	0.0401394	0.213	0.17	1	CD34+ Gran	CNTROB	Up
0.0273593	0.03778	0.116	0.084	1	CD34+ Gran	ATP1A1-AS1	Up
0.0273722	0.0757158	0.239	0.201	1	CD34+ Gran	PRAF2	Up
0.0274864	0.0662723	0.14	0.107	1	CD34+ Gran	CNFN	Up
0.0274916	0.0451502	0.16	0.124	1	CD34+ Gran	SPECC1L	Up
0.0275274	-0.0708311	0.948	0.959	1	CD34+ Gran	HADHA	Down
0.0275499	-0.0669739	0.184	0.225	1	CD34+ Gran	DSCC1	Down
0.0276235	0.0517765	0.241	0.197	1	CD34+ Gran	SNHG20	Up
0.0276765	0.102086	0.417	0.373	1	CD34+ Gran	BAALC	Up
0.0276801	-0.0871108	0.805	0.848	1	CD34+ Gran	ORMDL1	Down
0.0278398	0.0487797	0.122	0.091	1	CD34+ Gran	AC019294.2	Up
0.0278415	0.0468592	0.105	0.076	1	CD34+ Gran	GPR82	Up
0.0278732	0.0653956	0.455	0.399	1	CD34+ Gran	ECHDC2	Up
0.0279204	0.0825485	0.274	0.235	1	CD34+ Gran	C1orf54	Up
0.0279964	0.0842019	0.499	0.451	1	CD34+ Gran	CTNNA1	Up
0.0280117	0.106524	0.526	0.476	1	CD34+ Gran	CARHSP1	Up
0.0280626	0.0477748	0.44	0.383	1	CD34+ Gran	MAP7	Up
0.0280635	-0.0569942	0.184	0.226	1	CD34+ Gran	SLC15A2	Down
0.0281266	-0.0566976	1	1	1	CD34+ Gran	NACA	Down
0.0282221	0.0604368	0.229	0.189	1	CD34+ Gran	SGMS1	Up
0.0282263	0.0832343	0.911	0.878	1	CD34+ Gran	HMGN3	Up
0.0283793	-0.085212	0.852	0.856	1	CD34+ Gran	PET100	Down
0.0284458	0.0508245	0.188	0.149	1	CD34+ Gran	ARL13B	Up
0.0284727	0.0988597	0.571	0.532	1	CD34+ Gran	DIMT1	Up
0.0285378	0.0350489	0.353	0.296	1	CD34+ Gran	AC107204.1	Up
0.0286593	-0.091869	0.74	0.75	1	CD34+ Gran	KCNAB2	Down
0.0286864	-0.0747954	0.885	0.899	1	CD34+ Gran	PLEK	Down
0.0286916	-0.0869565	0.423	0.475	1	CD34+ Gran	BRCA1	Down
0.028798	0.0887269	0.893	0.862	1	CD34+ Gran	CCT3	Up
0.0288	0.0553571	0.126	0.094	1	CD34+ Gran	MIR155HG	Up
0.0288056	-0.066937	0.383	0.429	1	CD34+ Gran	TOB2	Down
0.028819	-0.049828	0.115	0.149	1	CD34+ Gran	AC007952.4	Down
0.0288619	0.0700821	0.727	0.669	1	CD34+ Gran	GOLPH3	Up
0.0289712	0.0570898	0.154	0.12	1	CD34+ Gran	ASGR1	Up
0.0289746	0.0885388	0.352	0.31	1	CD34+ Gran	EIF2B3	Up
0.0289989	-0.0820813	0.398	0.441	1	CD34+ Gran	CPNE8	Down
0.0290203	0.0410243	0.105	0.076	1	CD34+ Gran	ABHD12B	Up
0.0291588	-0.0595659	0.998	0.999	1	CD34+ Gran	RPS10	Down
0.0292151	-0.115647	0.663	0.688	1	CD34+ Gran	SNHG1	Down
0.0292254	0.0654627	0.265	0.22	1	CD34+ Gran	RHOC	Up
0.0292345	0.0774815	0.196	0.159	1	CD34+ Gran	NEFH	Up
0.029433	-0.0692326	0.358	0.406	1	CD34+ Gran	SNRK	Down
0.0295053	-0.0637893	0.815	0.841	1	CD34+ Gran	APPL1	Down
0.0295404	0.086344	0.538	0.5	1	CD34+ Gran	TLE5	Up
0.0295616	0.0661771	0.203	0.164	1	CD34+ Gran	TUBA4A	Up
0.0296003	0.0335569	0.117	0.086	1	CD34+ Gran	ATG16L1	Up
0.0296568	0.0466741	0.254	0.208	1	CD34+ Gran	AP000432.2	Up
0.0296905	0.0384552	0.105	0.076	1	CD34+ Gran	IFI44L	Up
0.029756	0.0766109	0.426	0.377	1	CD34+ Gran	BCL2L13	Up
0.0297768	0.0908432	0.601	0.559	1	CD34+ Gran	DCAF13	Up
0.0297816	-0.0590481	0.37	0.422	1	CD34+ Gran	MKNK2	Down
0.0298033	-0.059501	0.238	0.283	1	CD34+ Gran	DVL2	Down
0.0299124	0.0850529	0.532	0.487	1	CD34+ Gran	HNRNPA1P48	Up
0.0299599	-0.0567753	0.163	0.202	1	CD34+ Gran	LINC01949	Down
0.0299847	0.0774366	0.26	0.218	1	CD34+ Gran	EMILIN1	Up
0.0300497	0.0701666	0.292	0.249	1	CD34+ Gran	ATP8B2	Up
0.0300665	-0.0571244	0.479	0.524	1	CD34+ Gran	STK17A	Down
0.0300924	0.058103	0.147	0.114	1	CD34+ Gran	ARHGEF17	Up
0.0302265	0.0975696	0.595	0.556	1	CD34+ Gran	RBM23	Up
0.030259	0.058526	0.229	0.19	1	CD34+ Gran	LTBP4	Up
0.0302904	0.0483203	0.124	0.093	1	CD34+ Gran	FGD6	Up
0.0303216	0.0752755	0.317	0.273	1	CD34+ Gran	GCNT2	Up
0.0303288	0.0832319	0.338	0.3	1	CD34+ Gran	PNPLA2	Up
0.030451	0.0699872	0.267	0.226	1	CD34+ Gran	WBP1L	Up
0.0304738	-0.0685763	0.357	0.407	1	CD34+ Gran	SLC35C2	Down
0.0304781	0.0412024	0.107	0.078	1	CD34+ Gran	SGCE	Up
0.0305175	0.0713745	0.308	0.262	1	CD34+ Gran	AC025678.3	Up
0.0305276	-0.105191	0.923	0.932	1	CD34+ Gran	EIF1AX	Down
0.0305944	0.0518277	0.265	0.219	1	CD34+ Gran	AC005343.1	Up
0.0307884	-0.0779015	0.605	0.647	1	CD34+ Gran	ATM	Down
0.03083	-0.0379174	0.421	0.477	1	CD34+ Gran	SCAMP3	Down
0.0308487	-0.0687076	0.288	0.338	1	CD34+ Gran	HEATR1	Down
0.0309547	-0.0916298	0.452	0.498	1	CD34+ Gran	POLR3K	Down
0.030993	0.0603782	0.152	0.117	1	CD34+ Gran	DPYSL3	Up
0.0310167	-0.0967828	0.573	0.611	1	CD34+ Gran	EIF4A1	Down
0.0310293	0.0517876	0.395	0.343	1	CD34+ Gran	EXT2	Up
0.0310735	-0.0359345	1	1	1	CD34+ Gran	RPS2	Down
0.0310772	0.0430687	0.145	0.111	1	CD34+ Gran	PEX5	Up
0.0310953	-0.0487899	0.463	0.529	1	CD34+ Gran	IGF2BP1	Down
0.0311508	0.0380594	0.114	0.083	1	CD34+ Gran	CEACAM19	Up
0.03121	0.0924304	0.145	0.114	1	CD34+ Gran	TPM2	Up
0.0313882	-0.078502	0.272	0.314	1	CD34+ Gran	ABHD17C	Down
0.0314759	0.0396849	0.108	0.079	1	CD34+ Gran	PDE11A	Up
0.0314851	0.0521185	0.172	0.136	1	CD34+ Gran	LINC01630	Up
0.0315208	-0.0621029	0.987	0.982	1	CD34+ Gran	SNHG6	Down
0.0315421	0.0496498	0.104	0.076	1	CD34+ Gran	SLCO5A1	Up
0.0317154	0.068835	0.215	0.177	1	CD34+ Gran	C22orf46	Up
0.0317635	-0.0833422	0.387	0.433	1	CD34+ Gran	COPRS	Down
0.0318146	-0.0866858	0.288	0.334	1	CD34+ Gran	AC011447.3	Down
0.0319299	0.0863308	0.471	0.428	1	CD34+ Gran	STAT6	Up
0.032021	-0.0668114	0.989	0.985	1	CD34+ Gran	HMGN1	Down
0.0320781	-0.0736901	0.96	0.959	1	CD34+ Gran	SKP1	Down
0.0321406	0.0347894	0.113	0.082	1	CD34+ Gran	AC026356.2	Up
0.032152	0.0493893	0.259	0.214	1	CD34+ Gran	MAML2	Up
0.0322292	0.04742	0.144	0.111	1	CD34+ Gran	CRY1	Up
0.0323032	-0.0715088	0.518	0.573	1	CD34+ Gran	CETN2	Down
0.0323565	0.0488458	0.119	0.089	1	CD34+ Gran	GIPR	Up
0.0325532	0.0809341	0.468	0.424	1	CD34+ Gran	DNAH14	Up
0.0325602	-0.0622741	1	1	1	CD34+ Gran	SERF2	Down
0.0325904	0.0535212	0.19	0.152	1	CD34+ Gran	ENPP4	Up
0.0326074	0.0610031	0.341	0.292	1	CD34+ Gran	DHRSX	Up
0.0327034	-0.0678112	0.195	0.234	1	CD34+ Gran	MINCR	Down
0.0327687	-0.0500816	1	1	1	CD34+ Gran	RPL23	Down
0.032958	0.0913787	0.501	0.468	1	CD34+ Gran	ARL5A	Up
0.0330126	0.0395679	0.219	0.177	1	CD34+ Gran	ESRG	Up
0.0330357	-0.0607969	0.122	0.156	1	CD34+ Gran	AARS2	Down
0.0330426	-0.088187	0.64	0.674	1	CD34+ Gran	UTP11	Down
0.0330431	0.0547221	0.146	0.113	1	CD34+ Gran	AL445928.2	Up
0.0330607	0.0406563	0.14	0.106	1	CD34+ Gran	RAB3B	Up
0.0331457	-0.0299227	0.275	0.329	1	CD34+ Gran	LMNB2	Down
0.0331867	0.0632421	0.396	0.348	1	CD34+ Gran	CYFIP1	Up
0.0332076	0.0487797	0.12	0.09	1	CD34+ Gran	AL109837.3	Up
0.0332767	-0.062022	0.338	0.386	1	CD34+ Gran	RP2	Down
0.0333699	-0.0617206	0.983	0.978	1	CD34+ Gran	RBM39	Down
0.0333789	-0.0520552	0.17	0.207	1	CD34+ Gran	AC127024.8	Down
0.0333906	0.0520145	0.107	0.079	1	CD34+ Gran	ADAM22	Up
0.0334925	-0.0671191	1	1	1	CD34+ Gran	MT-RNR1	Down
0.0335108	0.108357	0.659	0.612	1	CD34+ Gran	SEC24D	Up
0.0335622	0.0787518	0.766	0.717	1	CD34+ Gran	SNX6	Up
0.0336272	0.0770718	0.382	0.336	1	CD34+ Gran	ZMAT1	Up
0.0336751	0.0914129	0.86	0.84	1	CD34+ Gran	TMEM167A	Up
0.0337154	0.0865812	0.434	0.393	1	CD34+ Gran	SLITRK4	Up
0.0337171	0.107884	0.633	0.598	1	CD34+ Gran	STAT1	Up
0.0337431	0.0853647	0.291	0.253	1	CD34+ Gran	KLHL6	Up
0.0337522	0.171698	0.733	0.695	1	CD34+ Gran	CXCL8	Up
0.0337716	0.0634667	0.268	0.225	1	CD34+ Gran	DGKH	Up
0.0338168	-0.104776	0.552	0.596	1	CD34+ Gran	MIR181A1HG	Down
0.0338392	0.0942822	0.499	0.458	1	CD34+ Gran	PPP2R2A	Up
0.0338936	-0.0785485	0.209	0.247	1	CD34+ Gran	CLN6	Down
0.0338975	0.0706335	0.653	0.595	1	CD34+ Gran	USP9X	Up
0.0340393	-0.0463136	0.111	0.145	1	CD34+ Gran	ZFYVE21	Down
0.0340431	0.0498537	0.218	0.178	1	CD34+ Gran	CSRNP1	Up
0.0340956	0.0412886	0.207	0.167	1	CD34+ Gran	ZNF804A	Up
0.0341411	0.0679319	0.5	0.452	1	CD34+ Gran	MXD4	Up
0.0341524	0.0556562	0.1	0.072	1	CD34+ Gran	MIAT	Up
0.034157	0.0617313	0.227	0.189	1	CD34+ Gran	FKBP7	Up
0.0342197	0.0822822	0.405	0.366	1	CD34+ Gran	MEF2A	Up
0.0342973	-0.086197	0.763	0.784	1	CD34+ Gran	CFDP1	Down
0.0343639	-0.0346957	1	1	1	CD34+ Gran	RPS28	Down
0.0343682	0.0565672	0.173	0.138	1	CD34+ Gran	DTWD2	Up
0.0344511	0.0852554	0.482	0.438	1	CD34+ Gran	ARHGAP30	Up
0.0345057	-0.0681484	0.298	0.342	1	CD34+ Gran	CYP51A1	Down
0.0345166	0.0595748	0.175	0.14	1	CD34+ Gran	MFSD6	Up
0.0345579	0.0611403	0.403	0.352	1	CD34+ Gran	SEPHS1	Up
0.0345583	0.0830377	0.647	0.594	1	CD34+ Gran	RDH11	Up
0.0345641	-0.0874687	0.715	0.729	1	CD34+ Gran	ADH5	Down
0.0346736	-0.0631509	0.275	0.322	1	CD34+ Gran	AL109809.5	Down
0.0346741	0.0608094	0.371	0.323	1	CD34+ Gran	KIAA1328	Up
0.0346914	-0.0351762	0.115	0.149	1	CD34+ Gran	TLCD3A	Down
0.0348009	0.068835	0.47	0.427	1	CD34+ Gran	MAGED2	Up
0.0348073	0.0781887	0.858	0.833	1	CD34+ Gran	SP100	Up
0.034836	0.0483803	0.166	0.13	1	CD34+ Gran	KLHL2	Up
0.0349082	0.0479035	0.234	0.192	1	CD34+ Gran	TPTEP2	Up
0.0349111	0.065902	0.344	0.298	1	CD34+ Gran	NAAA	Up
0.035012	0.0488	0.194	0.156	1	CD34+ Gran	MYNN	Up
0.0350234	0.0875423	0.925	0.914	1	CD34+ Gran	ESD	Up
0.0350985	0.0741003	0.293	0.251	1	CD34+ Gran	GNAI1	Up
0.0351352	0.0563847	0.213	0.174	1	CD34+ Gran	TESPA1	Up
0.0351419	0.0503385	0.158	0.124	1	CD34+ Gran	STK24	Up
0.035146	-0.0625945	0.43	0.48	1	CD34+ Gran	KXD1	Down
0.0351566	0.0649677	0.745	0.706	1	CD34+ Gran	APBB1IP	Up
0.0351835	-0.0812374	0.988	0.986	1	CD34+ Gran	SEC61B	Down
0.0352315	0.0823585	0.726	0.698	1	CD34+ Gran	PCBD1	Up
0.0352625	0.0734114	0.197	0.162	1	CD34+ Gran	TTC39B	Up
0.0353256	-0.083164	0.813	0.816	1	CD34+ Gran	ECH1	Down
0.03533	-0.0721834	0.185	0.223	1	CD34+ Gran	LRG1	Down
0.0354284	-0.0623706	0.352	0.399	1	CD34+ Gran	RFC2	Down
0.0354369	-0.0557519	0.152	0.188	1	CD34+ Gran	ZNF85	Down
0.0354676	-0.0500536	0.486	0.543	1	CD34+ Gran	IDH3B	Down
0.0355917	0.0674247	0.245	0.206	1	CD34+ Gran	SELENOP	Up
0.0356787	0.0442427	0.373	0.318	1	CD34+ Gran	UGGT2	Up
0.0357618	-0.044805	0.115	0.148	1	CD34+ Gran	WASH5P	Down
0.0357843	0.047189	0.169	0.134	1	CD34+ Gran	AL117328.2	Up
0.035786	0.0663248	0.234	0.195	1	CD34+ Gran	MICAL3	Up
0.0358033	0.0447411	0.173	0.137	1	CD34+ Gran	LNCAROD	Up
0.0358379	0.0784151	0.403	0.359	1	CD34+ Gran	RAP2C	Up
0.0358922	0.0510058	0.173	0.138	1	CD34+ Gran	SLC25A43	Up
0.0359244	0.0481226	0.109	0.081	1	CD34+ Gran	ZBTB26	Up
0.035926	0.078254	0.295	0.255	1	CD34+ Gran	HACD2	Up
0.0359533	-0.052396	0.13	0.164	1	CD34+ Gran	AF131215.4	Down
0.0359595	0.0426579	0.15	0.116	1	CD34+ Gran	APOL2	Up
0.0361364	0.0712369	0.358	0.32	1	CD34+ Gran	HTT	Up
0.0361719	0.073698	0.591	0.546	1	CD34+ Gran	PHACTR2	Up
0.0361888	0.0399176	0.106	0.078	1	CD34+ Gran	DHRS12	Up
0.0362317	-0.0784726	0.473	0.532	1	CD34+ Gran	NUP37	Down
0.0362566	0.0520429	0.192	0.155	1	CD34+ Gran	SILC1	Up
0.036272	-0.0536544	0.202	0.245	1	CD34+ Gran	CSF2RA	Down
0.0363083	0.086801	0.737	0.711	1	CD34+ Gran	POLR2H	Up
0.0363166	0.0523167	0.17	0.135	1	CD34+ Gran	CNR2	Up
0.0364717	0.0699502	0.521	0.476	1	CD34+ Gran	CD2AP	Up
0.0364814	0.050699	0.109	0.081	1	CD34+ Gran	AC022107.1	Up
0.0364814	-0.102024	0.731	0.761	1	CD34+ Gran	SNHG19	Down
0.036614	0.103284	0.76	0.721	1	CD34+ Gran	MBNL1-AS1	Up
0.0366973	0.053513	0.222	0.183	1	CD34+ Gran	VPS39	Up
0.0367103	0.042119	0.115	0.086	1	CD34+ Gran	NRG4	Up
0.0367961	0.0559219	0.225	0.185	1	CD34+ Gran	KCTD18	Up
0.0368004	0.0367967	0.134	0.102	1	CD34+ Gran	PHC1	Up
0.036861	0.0495144	0.111	0.083	1	CD34+ Gran	LRRC2	Up
0.0368883	-0.0732608	0.988	0.988	1	CD34+ Gran	EEF1D	Down
0.0369224	0.0484668	0.5	0.447	1	CD34+ Gran	TGIF1	Up
0.0369651	0.0483217	0.101	0.073	1	CD34+ Gran	SLC31A2	Up
0.0370197	-0.104678	0.266	0.304	1	CD34+ Gran	UGCG	Down
0.0371464	0.0695361	0.209	0.173	1	CD34+ Gran	PUDP	Up
0.0371894	0.0487043	0.133	0.102	1	CD34+ Gran	CRYBG3	Up
0.0371937	0.0859432	0.492	0.455	1	CD34+ Gran	SIKE1	Up
0.0372056	0.0738186	0.417	0.376	1	CD34+ Gran	SNHG26	Up
0.037208	0.0508881	0.193	0.156	1	CD34+ Gran	GPR157	Up
0.0372851	0.0769224	0.282	0.241	1	CD34+ Gran	CSRP1	Up
0.0373338	0.0493683	0.512	0.451	1	CD34+ Gran	ARL5B	Up
0.037335	-0.0375282	0.337	0.393	1	CD34+ Gran	AC068587.4	Down
0.0374197	-0.16506	0.44	0.468	1	CD34+ Gran	CENPU	Down
0.0374286	0.104696	0.545	0.515	1	CD34+ Gran	EMC7	Up
0.0374516	-0.0301716	1	1	1	CD34+ Gran	RPL18	Down
0.0375034	0.054737	0.193	0.157	1	CD34+ Gran	FBXL18	Up
0.037542	0.108253	0.652	0.625	1	CD34+ Gran	MUC20-OT1	Up
0.0375633	0.0959274	0.7	0.667	1	CD34+ Gran	STAT3	Up
0.0376005	-0.0594156	0.789	0.811	1	CD34+ Gran	CKS2	Down
0.0377207	-0.0877859	0.368	0.408	1	CD34+ Gran	TSPOAP1	Down
0.0377826	-0.0703058	0.26	0.3	1	CD34+ Gran	PPM1D	Down
0.0378776	0.0667278	0.404	0.35	1	CD34+ Gran	KLF13	Up
0.0380044	-0.0928224	0.632	0.671	1	CD34+ Gran	CHCHD5	Down
0.0380202	0.0941931	0.403	0.363	1	CD34+ Gran	ICE1	Up
0.0380385	-0.0822976	0.227	0.265	1	CD34+ Gran	EMSY	Down
0.0380489	0.0401467	0.145	0.112	1	CD34+ Gran	PRDM15	Up
0.0380587	-0.0500256	0.161	0.2	1	CD34+ Gran	MFSD5	Down
0.038099	0.0628966	0.435	0.384	1	CD34+ Gran	AHCTF1	Up
0.0382016	0.0415842	0.123	0.093	1	CD34+ Gran	LINC00629	Up
0.0382164	0.063415	0.575	0.53	1	CD34+ Gran	NSMCE1	Up
0.0382404	0.110891	0.574	0.534	1	CD34+ Gran	ADGRE5	Up
0.0383189	-0.0635769	0.131	0.164	1	CD34+ Gran	SERPINF1	Down
0.0383845	-0.0548675	0.4	0.445	1	CD34+ Gran	RUFY1	Down
0.0384284	0.0491594	0.261	0.217	1	CD34+ Gran	POLB	Up
0.03847	-0.0476224	0.668	0.713	1	CD34+ Gran	SUGP2	Down
0.0384969	-0.0626112	0.727	0.764	1	CD34+ Gran	SMC3	Down
0.0385502	-0.0615855	0.346	0.394	1	CD34+ Gran	MAP4K2	Down
0.0385544	-0.0825177	0.437	0.475	1	CD34+ Gran	FES	Down
0.0385653	-0.0539692	0.161	0.198	1	CD34+ Gran	TRAFD1	Down
0.0385849	0.0541204	0.173	0.138	1	CD34+ Gran	BMS1P2	Up
0.0385985	0.116249	0.513	0.487	1	CD34+ Gran	TBCB	Up
0.0386221	-0.0909755	0.946	0.946	1	CD34+ Gran	PEBP1	Down
0.0386272	-0.0885112	0.513	0.556	1	CD34+ Gran	IDH3G	Down
0.0386621	0.0557083	0.139	0.107	1	CD34+ Gran	AL354707.1	Up
0.038819	-0.0360214	0.323	0.377	1	CD34+ Gran	GSR	Down
0.0388247	-0.0928188	0.551	0.59	1	CD34+ Gran	JAGN1	Down
0.0388612	0.0777861	0.715	0.664	1	CD34+ Gran	MRPL42	Up
0.0388742	0.0487137	0.118	0.089	1	CD34+ Gran	TPM1	Up
0.0389209	-0.0420299	0.12	0.154	1	CD34+ Gran	PCNX3	Down
0.0389373	-0.10217	0.505	0.543	1	CD34+ Gran	TYMP	Down
0.038986	-0.0780795	0.462	0.513	1	CD34+ Gran	TACC3	Down
0.0390311	-0.0372556	0.089	0.118	1	CD34+ Gran	AL035587.2	Down
0.0391669	0.060011	0.173	0.139	1	CD34+ Gran	ANKZF1	Up
0.0392445	0.0499458	0.594	0.542	1	CD34+ Gran	SMAP2	Up
0.0392831	-0.0357938	0.159	0.197	1	CD34+ Gran	HNRNPLL	Down
0.0392871	-0.0470226	0.154	0.192	1	CD34+ Gran	CDC25A	Down
0.0393119	-0.10255	0.963	0.953	1	CD34+ Gran	HMGA1	Down
0.0394838	-0.0899699	0.595	0.63	1	CD34+ Gran	DCXR	Down
0.0394923	-0.0508929	0.215	0.257	1	CD34+ Gran	TXNRD2	Down
0.0395786	0.0868301	0.487	0.445	1	CD34+ Gran	CXCL2	Up
0.0396435	0.0599707	0.245	0.203	1	CD34+ Gran	ARL4C	Up
0.0396544	0.0600923	0.323	0.277	1	CD34+ Gran	LINC00685	Up
0.0396582	-0.06996	0.942	0.948	1	CD34+ Gran	TPI1	Down
0.0396903	0.0522103	0.133	0.103	1	CD34+ Gran	EML1	Up
0.0397097	-0.0683743	0.938	0.932	1	CD34+ Gran	ATP6V0B	Down
0.0397422	-0.038739	0.084	0.113	1	CD34+ Gran	MSR1	Down
0.0398248	0.0371611	0.101	0.073	1	CD34+ Gran	SNX24	Up
0.0398643	0.0756185	0.54	0.489	1	CD34+ Gran	ZNF281	Up
0.0398899	-0.047618	0.116	0.148	1	CD34+ Gran	CYP1B1-AS1	Down
0.0398972	-0.0895483	0.529	0.562	1	CD34+ Gran	TOPBP1	Down
0.0399393	0.0691299	0.228	0.191	1	CD34+ Gran	AKAP7	Up
0.0399589	0.0478272	0.299	0.253	1	CD34+ Gran	BATF	Up
0.0399925	0.0417022	0.119	0.09	1	CD34+ Gran	MINDY1	Up
0.0400001	0.0982736	0.424	0.386	1	CD34+ Gran	SLC25A23	Up
0.0400523	-0.0818932	0.959	0.95	1	CD34+ Gran	ATP5F1B	Down
0.0401688	0.0642227	0.26	0.219	1	CD34+ Gran	LINC00884	Up
0.0402302	0.0387721	0.124	0.094	1	CD34+ Gran	PDE6A	Up
0.0402338	-0.069566	0.261	0.3	1	CD34+ Gran	RFT1	Down
0.0402497	0.0608813	0.273	0.234	1	CD34+ Gran	PGAP1	Up
0.0403151	0.057272	0.136	0.106	1	CD34+ Gran	TLR1	Up
0.0403581	-0.0727808	0.943	0.942	1	CD34+ Gran	BCLAF1	Down
0.0404037	-0.0449284	0.111	0.144	1	CD34+ Gran	OR1A1	Down
0.0405428	-0.0369888	0.098	0.129	1	CD34+ Gran	RFPL1S	Down
0.0405737	0.0910814	0.312	0.274	1	CD34+ Gran	TMEM251	Up
0.0406878	-0.0731239	0.411	0.452	1	CD34+ Gran	PIGK	Down
0.040815	0.0436207	0.499	0.448	1	CD34+ Gran	ADAM17	Up
0.0409697	0.0612086	0.25	0.212	1	CD34+ Gran	SLC10A7	Up
0.0409868	0.051469	0.224	0.185	1	CD34+ Gran	MMD	Up
0.0410941	0.0650755	0.447	0.399	1	CD34+ Gran	RXYLT1	Up
0.0410962	-0.0875631	0.979	0.977	1	CD34+ Gran	ATP5F1A	Down
0.0411106	0.0771182	0.591	0.554	1	CD34+ Gran	OTUB1	Up
0.0411428	0.0405545	0.118	0.089	1	CD34+ Gran	AC107375.1	Up
0.0411471	0.0722403	0.297	0.255	1	CD34+ Gran	SRGAP2B	Up
0.0411734	-0.0482428	0.255	0.302	1	CD34+ Gran	DENND4B	Down
0.0411966	-0.0755327	0.589	0.626	1	CD34+ Gran	GNG5	Down
0.0412519	0.0566481	0.129	0.1	1	CD34+ Gran	LINC01422	Up
0.0413369	-0.0401486	0.085	0.114	1	CD34+ Gran	OSBPL5	Down
0.0413394	0.073051	0.432	0.39	1	CD34+ Gran	SYNJ2BP	Up
0.0414839	0.048072	0.182	0.147	1	CD34+ Gran	CEP70	Up
0.0415535	0.095109	0.517	0.476	1	CD34+ Gran	OPHN1	Up
0.0415839	0.0382579	0.155	0.121	1	CD34+ Gran	AC116611.1	Up
0.0418447	-0.10172	0.528	0.557	1	CD34+ Gran	FKBP5	Down
0.0418531	0.0951456	0.834	0.81	1	CD34+ Gran	PRRG3	Up
0.0418788	0.0700892	0.199	0.164	1	CD34+ Gran	KIAA1549	Up
0.0418821	-0.0499782	0.305	0.351	1	CD34+ Gran	COPS7A	Down
0.0418949	-0.07099	0.422	0.475	1	CD34+ Gran	ATAD5	Down
0.0419005	0.0892399	0.96	0.952	1	CD34+ Gran	RBMX	Up
0.0419315	-0.0565866	0.212	0.251	1	CD34+ Gran	NOTCH1	Down
0.0419587	-0.0793312	0.839	0.854	1	CD34+ Gran	CREG1	Down
0.0419811	-0.0678592	0.465	0.519	1	CD34+ Gran	BFAR	Down
0.0420046	-0.0736831	0.728	0.75	1	CD34+ Gran	PRKCSH	Down
0.0420175	-0.0664093	0.418	0.462	1	CD34+ Gran	SLC35B1	Down
0.0420615	0.0596357	0.316	0.273	1	CD34+ Gran	DUSP12	Up
0.0420883	-0.049915	0.129	0.162	1	CD34+ Gran	AL353763.2	Down
0.0421523	-0.0967151	0.649	0.679	1	CD34+ Gran	AACS	Down
0.0421883	-0.0846233	0.409	0.448	1	CD34+ Gran	C22orf39	Down
0.0421915	0.105554	0.988	0.977	1	CD34+ Gran	S100A4	Up
0.0422028	-0.0897425	0.562	0.593	1	CD34+ Gran	EXOSC8	Down
0.0422565	-0.0396176	0.102	0.133	1	CD34+ Gran	ULK2	Down
0.0422872	0.07711	0.657	0.622	1	CD34+ Gran	C1orf162	Up
0.0423137	0.0847636	0.305	0.268	1	CD34+ Gran	AC008875.3	Up
0.0423216	-0.0860486	0.531	0.555	1	CD34+ Gran	RAD51C	Down
0.0423752	-0.0589643	0.355	0.407	1	CD34+ Gran	WDR18	Down
0.0423764	0.0704305	0.355	0.31	1	CD34+ Gran	SLC9B2	Up
0.0423801	0.0693682	0.115	0.088	1	CD34+ Gran	ZNF462	Up
0.0424098	0.0601141	0.268	0.228	1	CD34+ Gran	GLCCI1	Up
0.0424654	0.0667971	0.465	0.417	1	CD34+ Gran	PLEKHO1	Up
0.0426285	0.0613427	0.32	0.275	1	CD34+ Gran	C9orf72	Up
0.0426427	0.0582315	0.272	0.23	1	CD34+ Gran	MX2	Up
0.0426911	-0.0910476	0.951	0.952	1	CD34+ Gran	CUTA	Down
0.0427292	-0.0661647	0.291	0.332	1	CD34+ Gran	GTF3C2	Down
0.0427438	0.0327737	0.103	0.076	1	CD34+ Gran	AC023355.1	Up
0.0427724	0.0419662	0.16	0.126	1	CD34+ Gran	POMT2	Up
0.0428111	0.0518687	0.134	0.104	1	CD34+ Gran	SDC4	Up
0.0428182	0.0876406	0.333	0.296	1	CD34+ Gran	TP53TG1	Up
0.0428663	-0.0560851	0.339	0.384	1	CD34+ Gran	2025-03-05	Down
0.0429222	-0.0668644	0.136	0.169	1	CD34+ Gran	ULK1	Down
0.0429259	-0.0720743	0.219	0.257	1	CD34+ Gran	TRIB3	Down
0.042945	0.0543762	0.155	0.123	1	CD34+ Gran	RIPK1	Up
0.0429587	-0.0499545	0.539	0.601	1	CD34+ Gran	RAB4A	Down
0.0430118	0.042119	0.114	0.086	1	CD34+ Gran	EPOR	Up
0.0430533	0.0583312	0.887	0.867	1	CD34+ Gran	RAB27A	Up
0.0431842	-0.0622289	0.361	0.406	1	CD34+ Gran	AATF	Down
0.0432215	-0.0735306	0.647	0.679	1	CD34+ Gran	RPS19BP1	Down
0.043274	0.116804	0.864	0.85	1	CD34+ Gran	C1QTNF4	Up
0.0433013	-0.0456416	0.09	0.118	1	CD34+ Gran	INAFM1	Down
0.0433519	-0.0409528	0.3	0.351	1	CD34+ Gran	SLC2A5	Down
0.0434106	0.0699667	0.364	0.32	1	CD34+ Gran	ZBTB1	Up
0.0434669	0.0286299	0.122	0.092	1	CD34+ Gran	FJX1	Up
0.0436778	-0.0456678	0.093	0.122	1	CD34+ Gran	AC090236.2	Down
0.0437618	-0.024468	0.466	0.419	1	CD34+ Gran	BTG2	Down
0.0437714	0.080602	0.359	0.323	1	CD34+ Gran	WDR19	Up
0.0437978	-0.0705572	0.245	0.284	1	CD34+ Gran	SHLD2	Down
0.0438114	0.0300506	0.13	0.099	1	CD34+ Gran	SARNP	Up
0.0438379	0.0354808	0.104	0.077	1	CD34+ Gran	SERINC2	Up
0.043866	0.0330471	0.126	0.095	1	CD34+ Gran	LINC01004	Up
0.0439258	-0.104703	0.585	0.621	1	CD34+ Gran	AFG3L2	Down
0.0439291	-0.0751895	0.985	0.981	1	CD34+ Gran	TMBIM6	Down
0.0439314	-0.0798539	0.421	0.464	1	CD34+ Gran	FAM126B	Down
0.0440156	0.0478739	0.282	0.238	1	CD34+ Gran	TRPS1	Up
0.04402	-0.07889	0.983	0.982	1	CD34+ Gran	SRSF5	Down
0.0440374	0.0767507	0.258	0.221	1	CD34+ Gran	MALT1	Up
0.0440379	0.0421778	0.256	0.215	1	CD34+ Gran	LY75	Up
0.0441646	0.0846268	0.6	0.548	1	CD34+ Gran	IGF1R	Up
0.0442838	0.0651729	0.574	0.531	1	CD34+ Gran	MTHFD2L	Up
0.044386	-0.0784895	0.544	0.573	1	CD34+ Gran	RBM22	Down
0.0443892	-0.0338944	0.116	0.149	1	CD34+ Gran	TSBP1-AS1	Down
0.044484	0.0901447	0.24	0.207	1	CD34+ Gran	DIXDC1	Up
0.0446262	-0.07898	0.501	0.544	1	CD34+ Gran	R3HDM1	Down
0.0446333	-0.0726985	0.904	0.908	1	CD34+ Gran	SF3B1	Down
0.0448796	-0.0655614	0.654	0.7	1	CD34+ Gran	FAAP20	Down
0.0449736	0.0314142	0.104	0.077	1	CD34+ Gran	ZFP1	Up
0.0449996	0.0637015	0.766	0.729	1	CD34+ Gran	HSPA4	Up
0.0450261	0.0518007	0.136	0.106	1	CD34+ Gran	MICALL1	Up
0.0450264	-0.0592048	0.997	0.998	1	CD34+ Gran	HINT1	Down
0.0450817	-0.0700707	0.999	1	1	CD34+ Gran	MT-CYB	Down
0.0451064	-0.0786984	0.426	0.461	1	CD34+ Gran	ZDHHC2	Down
0.0451675	0.0472508	0.161	0.128	1	CD34+ Gran	KCNMB1	Up
0.0451712	0.0847937	0.93	0.898	1	CD34+ Gran	RUNX1	Up
0.0452251	0.0300967	0.148	0.115	1	CD34+ Gran	AC011498.7	Up
0.045374	-0.061345	0.266	0.307	1	CD34+ Gran	SND1-IT1	Down
0.0454109	-0.0588682	0.618	0.66	1	CD34+ Gran	TAOK1	Down
0.045415	0.0886578	0.402	0.366	1	CD34+ Gran	GALNT14	Up
0.0456273	0.0969319	0.873	0.865	1	CD34+ Gran	BLOC1S6	Up
0.0457326	-0.0688608	0.797	0.82	1	CD34+ Gran	DHCR24	Down
0.0457461	-0.044304	0.186	0.225	1	CD34+ Gran	THEMIS2	Down
0.0457745	-0.079649	0.668	0.704	1	CD34+ Gran	LEPROTL1	Down
0.0458006	-0.0542361	0.589	0.617	1	CD34+ Gran	SREBF2	Down
0.0458642	-0.177626	0.906	0.898	1	CD34+ Gran	SNHG3	Down
0.0459088	-0.0586517	0.222	0.263	1	CD34+ Gran	STXBP4	Down
0.0460733	0.0910307	0.502	0.454	1	CD34+ Gran	NT5DC2	Up
0.0461981	-0.0499975	0.162	0.198	1	CD34+ Gran	RCAN1	Down
0.0462488	-0.0408701	0.382	0.438	1	CD34+ Gran	PPP6R2	Down
0.0463017	-0.0468982	0.881	0.856	1	CD34+ Gran	PABPN1	Down
0.0463305	0.0648669	0.665	0.627	1	CD34+ Gran	ZMYND8	Up
0.0464504	-0.0567201	0.129	0.16	1	CD34+ Gran	KAT2A	Down
0.0464738	-0.0699583	0.623	0.657	1	CD34+ Gran	ANKRD13D	Down
0.0464956	-0.0742615	0.224	0.26	1	CD34+ Gran	HEXIM1	Down
0.0465217	0.0590159	0.264	0.224	1	CD34+ Gran	2025-03-01	Up
0.0465672	-0.0286972	0.091	0.121	1	CD34+ Gran	ZNF764	Down
0.0467473	-0.0758449	0.271	0.307	1	CD34+ Gran	GRINA	Down
0.0468274	0.0350798	0.162	0.128	1	CD34+ Gran	FAM227A	Up
0.0470766	0.0410243	0.109	0.082	1	CD34+ Gran	PEAK3	Up
0.0470873	0.0844326	0.85	0.841	1	CD34+ Gran	PRKAR1A	Up
0.0470922	-0.0732585	0.687	0.724	1	CD34+ Gran	TRIP12	Down
0.0471299	-0.0451144	0.159	0.195	1	CD34+ Gran	ZNF570	Down
0.0471762	-0.10778	0.953	0.946	1	CD34+ Gran	ATP5PF	Down
0.0472362	0.0826082	0.976	0.953	1	CD34+ Gran	CALM2	Up
0.0472437	-0.082328	0.368	0.41	1	CD34+ Gran	ZBTB11	Down
0.0472789	-0.0818309	0.973	0.976	1	CD34+ Gran	MT-TS1	Down
0.0472805	0.0677165	0.241	0.205	1	CD34+ Gran	NRGN	Up
0.0473037	0.0709487	0.221	0.185	1	CD34+ Gran	KIF16B	Up
0.0473494	0.0343727	0.122	0.093	1	CD34+ Gran	ROBO1	Up
0.0474238	0.0773869	0.498	0.457	1	CD34+ Gran	THUMPD2	Up
0.0474346	0.0938154	0.552	0.524	1	CD34+ Gran	TMEM248	Up
0.0474944	0.0869996	0.378	0.34	1	CD34+ Gran	USP9Y	Up
0.0476269	0.0446828	0.175	0.14	1	CD34+ Gran	ARHGAP22	Up
0.0477315	-0.0532925	0.109	0.139	1	CD34+ Gran	TNFRSF14	Down
0.0477988	-0.0372365	1	1	1	CD34+ Gran	RPL31	Down
0.04784	-0.0598431	0.805	0.816	1	CD34+ Gran	TM9SF3	Down
0.0478479	0.0589259	0.166	0.134	1	CD34+ Gran	PKD1L2	Up
0.0480271	-0.0533836	0.446	0.505	1	CD34+ Gran	EXOC5	Down
0.0481985	0.0449561	0.11	0.083	1	CD34+ Gran	HS3ST3B1	Up
0.0482418	-0.0571691	0.952	0.942	1	CD34+ Gran	NDUFC2	Down
0.0483032	-0.0471712	0.252	0.294	1	CD34+ Gran	TBC1D23	Down
0.0483299	0.0571375	0.508	0.462	1	CD34+ Gran	POM121C	Up
0.0483834	0.0483829	0.148	0.117	1	CD34+ Gran	CCDC144NL-AS1	Up
0.0484705	-0.0215184	0.272	0.325	1	CD34+ Gran	CENPE	Down
0.0484772	0.0768243	0.295	0.257	1	CD34+ Gran	NR4A2	Up
0.0484807	0.0495404	0.186	0.151	1	CD34+ Gran	CDCP1	Up
0.0486298	0.0515303	0.194	0.159	1	CD34+ Gran	VWA8	Up
0.0486499	0.0353788	0.131	0.101	1	CD34+ Gran	ZP3	Up
0.0486767	-0.0603219	0.298	0.337	1	CD34+ Gran	LASP1	Down
0.0487573	0.056815	0.189	0.156	1	CD34+ Gran	AC097662.1	Up
0.0489009	0.0524403	0.342	0.296	1	CD34+ Gran	FAM117B	Up
0.0490263	-0.068653	0.219	0.258	1	CD34+ Gran	DNAJC9	Down
0.0490306	-0.0882327	0.561	0.607	1	CD34+ Gran	VBP1	Down
0.0490581	0.0464519	0.68	0.618	1	CD34+ Gran	NFE2L2	Up
0.0491684	0.0415698	0.158	0.126	1	CD34+ Gran	APBB2	Up
0.0493192	0.0495144	0.106	0.08	1	CD34+ Gran	CEBPA	Up
0.0493603	-0.0583874	0.799	0.816	1	CD34+ Gran	THOC2	Down
0.0493812	-0.0680251	0.195	0.229	1	CD34+ Gran	PLCG1-AS1	Down
0.0494496	-0.0777756	0.758	0.777	1	CD34+ Gran	EIF4EBP2	Down
0.0494527	0.0515928	0.213	0.178	1	CD34+ Gran	CRTC3	Up
0.0495784	-0.073721	0.903	0.902	1	CD34+ Gran	HMGCR	Down
0.0496502	-0.0797579	0.947	0.939	1	CD34+ Gran	PARK7	Down
0.0496787	-0.0695964	0.55	0.592	1	CD34+ Gran	SYNGR2	Down
0.049854	-0.0813356	0.905	0.904	1	CD34+ Gran	COPE	Down
0.0498854	-0.0791624	0.727	0.774	1	CD34+ Gran	PGAM1	Down
0.0499059	-0.0791804	0.482	0.518	1	CD34+ Gran	MRPL35	Down
0.0499314	0.0628475	0.259	0.221	1	CD34+ Gran	MPDZ	Up
0.0500266	-0.0636372	0.584	0.62	1	CD34+ Gran	WAPL	Down
0.0501641	0.0380192	0.247	0.205	1	CD34+ Gran	LINC02470	Up
0.0503477	-0.0344042	0.234	0.279	1	CD34+ Gran	TARS2	Down
0.0504238	0.0647643	0.269	0.231	1	CD34+ Gran	LRP12	Up
0.050445	0.0874142	0.588	0.559	1	CD34+ Gran	MTCH1	Up
0.0506007	-0.0747601	0.948	0.953	1	CD34+ Gran	EDF1	Down
0.0506594	-0.0507003	0.511	0.552	1	CD34+ Gran	ZNF141	Down
0.0506919	-0.0810851	0.998	1	1	CD34+ Gran	SSR4	Down
0.0507271	-0.0836838	0.926	0.925	1	CD34+ Gran	PSMA4	Down
0.0508231	-0.0663501	0.288	0.325	1	CD34+ Gran	GPN1	Down
0.0508735	-0.0492327	0.173	0.211	1	CD34+ Gran	SERPINE2	Down
0.0508878	0.0296848	0.168	0.134	1	CD34+ Gran	WDR73	Up
0.0509197	0.0548665	0.169	0.137	1	CD34+ Gran	ZNF559	Up
0.0509321	0.0505714	0.184	0.15	1	CD34+ Gran	RNU5D-1	Up
0.0509768	0.0488175	0.266	0.227	1	CD34+ Gran	ING1	Up
0.0510187	0.0553165	0.542	0.499	1	CD34+ Gran	MRPL15	Up
0.0511161	-0.0710345	0.667	0.686	1	CD34+ Gran	NDUFS2	Down
0.051179	0.0262502	0.143	0.111	1	CD34+ Gran	TNFRSF13C	Up
0.0512028	-0.0769849	0.517	0.549	1	CD34+ Gran	APOBEC3C	Down
0.051213	-0.0491457	0.119	0.149	1	CD34+ Gran	MYT1L	Down
0.051256	0.039111	0.111	0.084	1	CD34+ Gran	COA6-AS1	Up
0.0512738	-0.0961242	0.415	0.451	1	CD34+ Gran	CENPH	Down
0.0513052	-0.0401146	0.149	0.184	1	CD34+ Gran	ZNF329	Down
0.0513271	0.0414333	0.148	0.117	1	CD34+ Gran	B4GALT2	Up
0.0513582	-0.0914315	0.921	0.899	1	CD34+ Gran	SPCS3	Down
0.0513857	-0.0327373	0.184	0.224	1	CD34+ Gran	UBIAD1	Down
0.0515957	0.0511436	0.18	0.147	1	CD34+ Gran	SPATA6	Up
0.0516012	0.050171	0.267	0.226	1	CD34+ Gran	FAM229B	Up
0.0516178	0.0605061	0.226	0.191	1	CD34+ Gran	C20orf194	Up
0.0516333	0.0472896	0.196	0.161	1	CD34+ Gran	AGAP3	Up
0.051697	-0.0825116	0.528	0.569	1	CD34+ Gran	OSTF1	Down
0.0517085	-0.118694	0.656	0.681	1	CD34+ Gran	PCNA	Down
0.0517323	-0.0756772	0.556	0.596	1	CD34+ Gran	UPF3B	Down
0.0517711	-0.0823416	0.363	0.398	1	CD34+ Gran	ALAS1	Down
0.0518411	0.0669969	0.383	0.342	1	CD34+ Gran	ACYP2	Up
0.0518434	0.0792379	0.239	0.203	1	CD34+ Gran	AL118516.1	Up
0.051863	0.0358004	0.127	0.098	1	CD34+ Gran	ZNF420	Up
0.0518856	0.0489164	0.344	0.303	1	CD34+ Gran	DYRK4	Up
0.0519189	0.0453856	0.208	0.172	1	CD34+ Gran	ZBED5-AS1	Up
0.0520266	0.0464093	0.212	0.175	1	CD34+ Gran	SSTR2	Up
0.0521319	-0.0380186	0.179	0.217	1	CD34+ Gran	AC141586.1	Down
0.0522639	0.0581872	0.215	0.18	1	CD34+ Gran	MED11	Up
0.0522771	0.0553145	0.334	0.294	1	CD34+ Gran	SUMF1	Up
0.052299	0.0989588	0.465	0.435	1	CD34+ Gran	IMPAD1	Up
0.0523635	0.0516602	0.175	0.143	1	CD34+ Gran	RGS12	Up
0.052369	-0.10229	0.527	0.572	1	CD34+ Gran	GMNN	Down
0.0524206	0.0531573	0.172	0.139	1	CD34+ Gran	PRKAR2A-AS1	Up
0.0524401	-0.0434483	0.784	0.828	1	CD34+ Gran	SUZ12	Down
0.0524651	-0.0761677	0.403	0.443	1	CD34+ Gran	UTP14A	Down
0.0525207	-0.0724807	0.301	0.34	1	CD34+ Gran	NUDT8	Down
0.0525618	0.0495661	0.165	0.133	1	CD34+ Gran	SLC47A1	Up
0.0525656	-0.0436624	0.508	0.555	1	CD34+ Gran	EHMT1	Down
0.0525679	0.0445083	0.169	0.136	1	CD34+ Gran	MELK	Up
0.0525692	0.060477	0.37	0.33	1	CD34+ Gran	SNRNP35	Up
0.0526047	0.0580216	0.253	0.215	1	CD34+ Gran	KCNC4	Up
0.0526437	0.0578166	0.397	0.359	1	CD34+ Gran	LYSMD2	Up
0.0526582	-0.0410002	1	1	1	CD34+ Gran	MT-ND3	Down
0.0527537	-0.0840786	0.893	0.878	1	CD34+ Gran	MIS18BP1	Down
0.053016	-0.0425491	0.421	0.475	1	CD34+ Gran	ARL6IP6	Down
0.0531066	0.0876375	0.592	0.556	1	CD34+ Gran	PLEKHA3	Up
0.0531486	-0.0560671	0.168	0.203	1	CD34+ Gran	SPATA33	Down
0.0531655	0.0907245	0.868	0.861	1	CD34+ Gran	SLTM	Up
0.0532118	0.0843915	0.344	0.31	1	CD34+ Gran	ZNF766	Up
0.0533497	0.0481562	0.379	0.333	1	CD34+ Gran	CRNDE	Up
0.0534155	0.0522963	0.394	0.345	1	CD34+ Gran	CCDC28A	Up
0.0536577	0.042257	0.442	0.396	1	CD34+ Gran	CSPP1	Up
0.0537064	-0.0492134	0.991	0.999	1	CD34+ Gran	MYL6	Down
0.0537652	0.0517722	0.235	0.2	1	CD34+ Gran	ZRSR2	Up
0.053776	0.0794623	0.389	0.355	1	CD34+ Gran	CCDC186	Up
0.0538244	0.0582104	0.303	0.264	1	CD34+ Gran	TIE1	Up
0.053866	-0.0777305	0.76	0.763	1	CD34+ Gran	SNHG7	Down
0.0538695	0.0755258	0.354	0.315	1	CD34+ Gran	PDE4DIP	Up
0.0540028	-0.0951515	0.979	0.976	1	CD34+ Gran	STMN1	Down
0.0540928	-0.0422509	0.113	0.143	1	CD34+ Gran	AP002761.4	Down
0.0541071	0.0743888	0.756	0.732	1	CD34+ Gran	MRPL3	Up
0.0541192	-0.0461418	0.157	0.192	1	CD34+ Gran	POLA2	Down
0.0541498	-0.0888465	0.359	0.393	1	CD34+ Gran	DDAH2	Down
0.0541761	0.0760104	0.359	0.322	1	CD34+ Gran	R3HDM4	Up
0.0541986	0.0480606	0.124	0.096	1	CD34+ Gran	NAP1L5	Up
0.0542175	0.0634686	0.289	0.25	1	CD34+ Gran	DUSP11	Up
0.0543193	-0.0696361	0.485	0.523	1	CD34+ Gran	RPP30	Down
0.0543199	0.0801452	0.351	0.312	1	CD34+ Gran	KCNK6	Up
0.0543474	-0.0489163	0.12	0.15	1	CD34+ Gran	ZCCHC4	Down
0.0543759	0.0739508	0.295	0.258	1	CD34+ Gran	MSANTD4	Up
0.0544547	0.0576977	0.252	0.214	1	CD34+ Gran	CMTM8	Up
0.0545109	0.0745276	0.367	0.323	1	CD34+ Gran	ZNF721	Up
0.054623	-0.0514269	0.149	0.182	1	CD34+ Gran	METTL1	Down
0.0546292	0.0749531	0.84	0.823	1	CD34+ Gran	NCALD	Up
0.054653	0.0785613	0.339	0.3	1	CD34+ Gran	CLOCK	Up
0.0546688	-0.0477717	0.254	0.295	1	CD34+ Gran	LIG3	Down
0.0546825	-0.0843708	0.898	0.912	1	CD34+ Gran	SNRPB	Down
0.0547818	-0.0259485	0.084	0.112	1	CD34+ Gran	MT-TL2	Down
0.0549499	0.0441258	0.101	0.076	1	CD34+ Gran	DUSP19	Up
0.0549724	-0.0656752	0.591	0.61	1	CD34+ Gran	LSP1	Down
0.0550177	-0.0583058	0.594	0.628	1	CD34+ Gran	NNT	Down
0.0550315	0.0513364	0.179	0.146	1	CD34+ Gran	GBP4	Up
0.0550586	-0.0643134	0.95	0.945	1	CD34+ Gran	CLTA	Down
0.0551242	-0.0548922	0.587	0.628	1	CD34+ Gran	SSNA1	Down
0.0551256	-0.0555138	0.35	0.393	1	CD34+ Gran	FBXO45	Down
0.055159	0.0484469	0.149	0.12	1	CD34+ Gran	DPY19L1P1	Up
0.0554457	-0.0476727	0.111	0.14	1	CD34+ Gran	AC006077.2	Down
0.0555362	0.0511362	0.162	0.132	1	CD34+ Gran	CABLES1	Up
0.0557243	0.0533262	0.115	0.089	1	CD34+ Gran	DTX3	Up
0.05574	0.078463	0.337	0.303	1	CD34+ Gran	SLC31A1	Up
0.0557586	-0.0759237	0.769	0.799	1	CD34+ Gran	KANSL1	Down
0.055773	-0.0441384	0.222	0.26	1	CD34+ Gran	METTL17	Down
0.0557925	0.0474088	0.196	0.161	1	CD34+ Gran	PNPLA6	Up
0.0558203	0.0526204	0.32	0.276	1	CD34+ Gran	AGL	Up
0.0559799	-0.0798937	0.501	0.525	1	CD34+ Gran	GGA2	Down
0.0560163	-0.0879329	0.732	0.76	1	CD34+ Gran	IPO5	Down
0.0560372	-0.0569208	0.218	0.254	1	CD34+ Gran	JAG1	Down
0.0560648	-0.125637	0.934	0.947	1	CD34+ Gran	PA2G4	Down
0.0561142	-0.0420599	0.215	0.255	1	CD34+ Gran	SYVN1	Down
0.0561175	-0.0771633	0.764	0.799	1	CD34+ Gran	GGNBP2	Down
0.0561192	-0.0469445	0.222	0.261	1	CD34+ Gran	ROGDI	Down
0.0562034	0.0471444	0.122	0.095	1	CD34+ Gran	AC017002.3	Up
0.0562494	-0.0520896	0.094	0.122	1	CD34+ Gran	HIST1H2BF	Down
0.0563018	0.0588961	0.307	0.265	1	CD34+ Gran	SLC12A2	Up
0.0564422	0.0787634	0.266	0.232	1	CD34+ Gran	IPO11	Up
0.0565377	-0.0367175	0.177	0.215	1	CD34+ Gran	PANK1	Down
0.0565753	0.0460964	0.186	0.152	1	CD34+ Gran	AC091729.3	Up
0.0565757	0.0396932	0.127	0.099	1	CD34+ Gran	AC103955.1	Up
0.0566307	0.0337117	0.114	0.087	1	CD34+ Gran	MFSD14A	Up
0.0566834	0.0527836	0.161	0.13	1	CD34+ Gran	ARMCX5	Up
0.0566934	-0.0866782	0.629	0.658	1	CD34+ Gran	ZNRD1	Down
0.0567105	-0.0766207	0.256	0.294	1	CD34+ Gran	HIST1H4E	Down
0.0569333	-0.0716969	0.671	0.709	1	CD34+ Gran	MFSD14C	Down
0.0569585	-0.0641288	0.162	0.194	1	CD34+ Gran	GRAMD1B	Down
0.0569732	-0.0915622	0.346	0.38	1	CD34+ Gran	NME3	Down
0.0569927	0.0436051	0.235	0.197	1	CD34+ Gran	MTFMT	Up
0.0572514	-0.0360651	1	1	1	CD34+ Gran	RPL36	Down
0.057422	0.0527116	0.382	0.337	1	CD34+ Gran	PSMD9	Up
0.0574481	-0.0676558	0.299	0.333	1	CD34+ Gran	CAMK2G	Down
0.0574521	0.0986315	0.83	0.815	1	CD34+ Gran	LYL1	Up
0.0574622	0.0487897	0.222	0.186	1	CD34+ Gran	PIGG	Up
0.0574991	0.0707668	0.494	0.446	1	CD34+ Gran	ARHGAP26	Up
0.0576008	0.0607328	0.242	0.207	1	CD34+ Gran	TAL1	Up
0.0576162	0.0372295	0.124	0.096	1	CD34+ Gran	C5orf56	Up
0.0577594	0.0411166	0.128	0.1	1	CD34+ Gran	TBCE	Up
0.05776	-0.0543079	0.614	0.656	1	CD34+ Gran	TIPRL	Down
[truncated: 179,614 more rows]

## Sheet: S1B
	GEP1	GEP2	GEP3
0	IGLL1	CLEC4A	HDC
1	MT-ND4	ARL4C	STXBP6
2	ZNF436-AS1	FAM30A	LMO4
3	HNRNPA1	GIMAP4	CPA3
4	MT-CYB	LY96	FCER1A
5	MT-ND1	S100A11	IL1RL1
6	MT-ATP6	PRSS2	SPP1
7	MT-CO3	ID3	DHRS9
8	H1F0	CD52	KRT1
9	CDK6	DMKN	GATA1
10	MT-CO2	LMNA	ITGA2B
11	GYPC	IGHM	ALOX5AP
12	ACTG1	KLF6	GATA2
13	HIST1H2AC	FXYD7	AMHR2
14	PLAC8	IGHD	SRGN
15	SERPINB1	APOE	GFI1B
16	H2AFY	KLF4	LIF
17	HNRNPC	JCHAIN	SLC45A3
18	SMIM24	HOPX	CPPED1
19	MT-ND5	FOS	AC020571.1
20	NPM1	CD48	CNRIP1
21	CCNI	SPINK2	AL157895.1
22	BAALC-AS2	KIAA0087	TPSB2
23	MT-ND3	VIM	CTTNBP2
24	LINC01268	ID1	FREM1
25	ANP32B	MEF2C	ABCC4
26	SOX4	ITM2B	SLC40A1
27	SNHG19	MZB1	PSTPIP2
28	MT-ND2	CD74	TPSAB1
29	SORL1	KLF2	TRAC
30	TKT	TMSB4X	SFRP5
31	RPL37A	C1QTNF4	MICAL2
32	AC084033.3	SCN3A	TNFSF10
33	ATP5F1C	B2M	NR4A1
34	TNFSF13B	FCMR	SGK1
35	C1QTNF4	CYTL1	LGALS1
36	HSP90AB1	DUSP6	SPINK4
37	MT-CO1	HLA-DQB1	GDF3
38	ORAI3	ANXA1	CKB
39	HIST3H2A	AVP	KCNH2
40	LSP1	PPP1R15A	MYL4
41	CAT	GNG11	CTNNBL1
42	VAMP8	NCF2	ST3GAL4
43	PTMA	CD34	SNX5
44	MSI2	IFI44L	ANGPT2
45	PRSS57	YPEL5	TPM4
46	HCST	KCTD12	EGR3
47	MT-ND4L	FBLN5	ATP6V0A2
48	RPLP2	AC020916.1	NR4A3
49	CELF2	S100Z	CSF2RB
50	TMSB4X	RGCC	ALDH1A1
51	ARHGDIB	HLA-DRA	LAT
52	SERF2	JAML	CMTM5
53	RPL4	CDA	TIMP3
54	SEPT6	FXYD5	SLC27A2
55	RPS16	TCF4	PRKAR2B
56	ATF4	HLA-B	SLC18A2
57	SNHG7	RASGEF1B	TFRC
58	AC137767.1	ID2	HBD
59	FTL	DUSP1	HPGDS
60	KIAA0087	EMCN	CXCL2
61	SELL	GLIPR1	C2orf88
62	MPG	HLA-DPA1	NTRK1
63	RPS21	APP	CXCL8
64	TXNL1	HLA-DPB1	APOC1
65	ARPC2	BST2	PBX1
66	RPS20	SAT1	PIEZO2
67	TAF7	HLA-DQA1	FOS
68	SNHG15	IDS	EGR1
69	RPL27A	CD99	MARCKSL1
70	PIK3R1	EMP1	CRYM
71	SRP14	RCBTB2	ARHGAP6
72	RPS11	S100A10	PLIN2
73	APEX1	AL590226.1	SERPINB1
74	CREBRF	TMEM176B	HYAL3
75	NREP	BEX5	IL1B
76	RPS25	CALD1	DEPTOR
77	GAPDH	LGMN	TMEM98
78	EIF1	UCHL1	CRABP1
79	RPL21	TRBC2	PPM1H
80	RCSD1	RAB31	ZEB2
81	STK32C	RABAC1	BMP2K
82	RPLP0	RBP7	CD82
83	EEF1B2	FXYD1	NR4A2
84	GABPB1-AS1	GLYATL2	TDRD9
85	RPL13A	MARCKS	AC084033.3
86	RPL7	CALM1	SH3GL3
87	MHENCR	TPT1	CCL1
88	RPS29	ANK3	AC007952.4
89	CLEC11A	TM4SF1	GPR141
90	TENT5A	TRH	MPP1
91	MAP7	AC104051.2	PRSS3
92	SPN	MYADM	MRPL52
93	LMO2	SOCS2	RHEX
94	SMIM3	MAP9	FOXP1
95	RPS27A	CTHRC1	MAX
96	POLR1D	SH3BP5	CCNA1
97	KLHL24	HLA-DRB1	IER2
98	RPL18A	LAMB4	TMSB10
99	MPO	RNASET2	CD63
